# Supplementary material
Source: PubMed Central journal article supplement (PMC6194058)

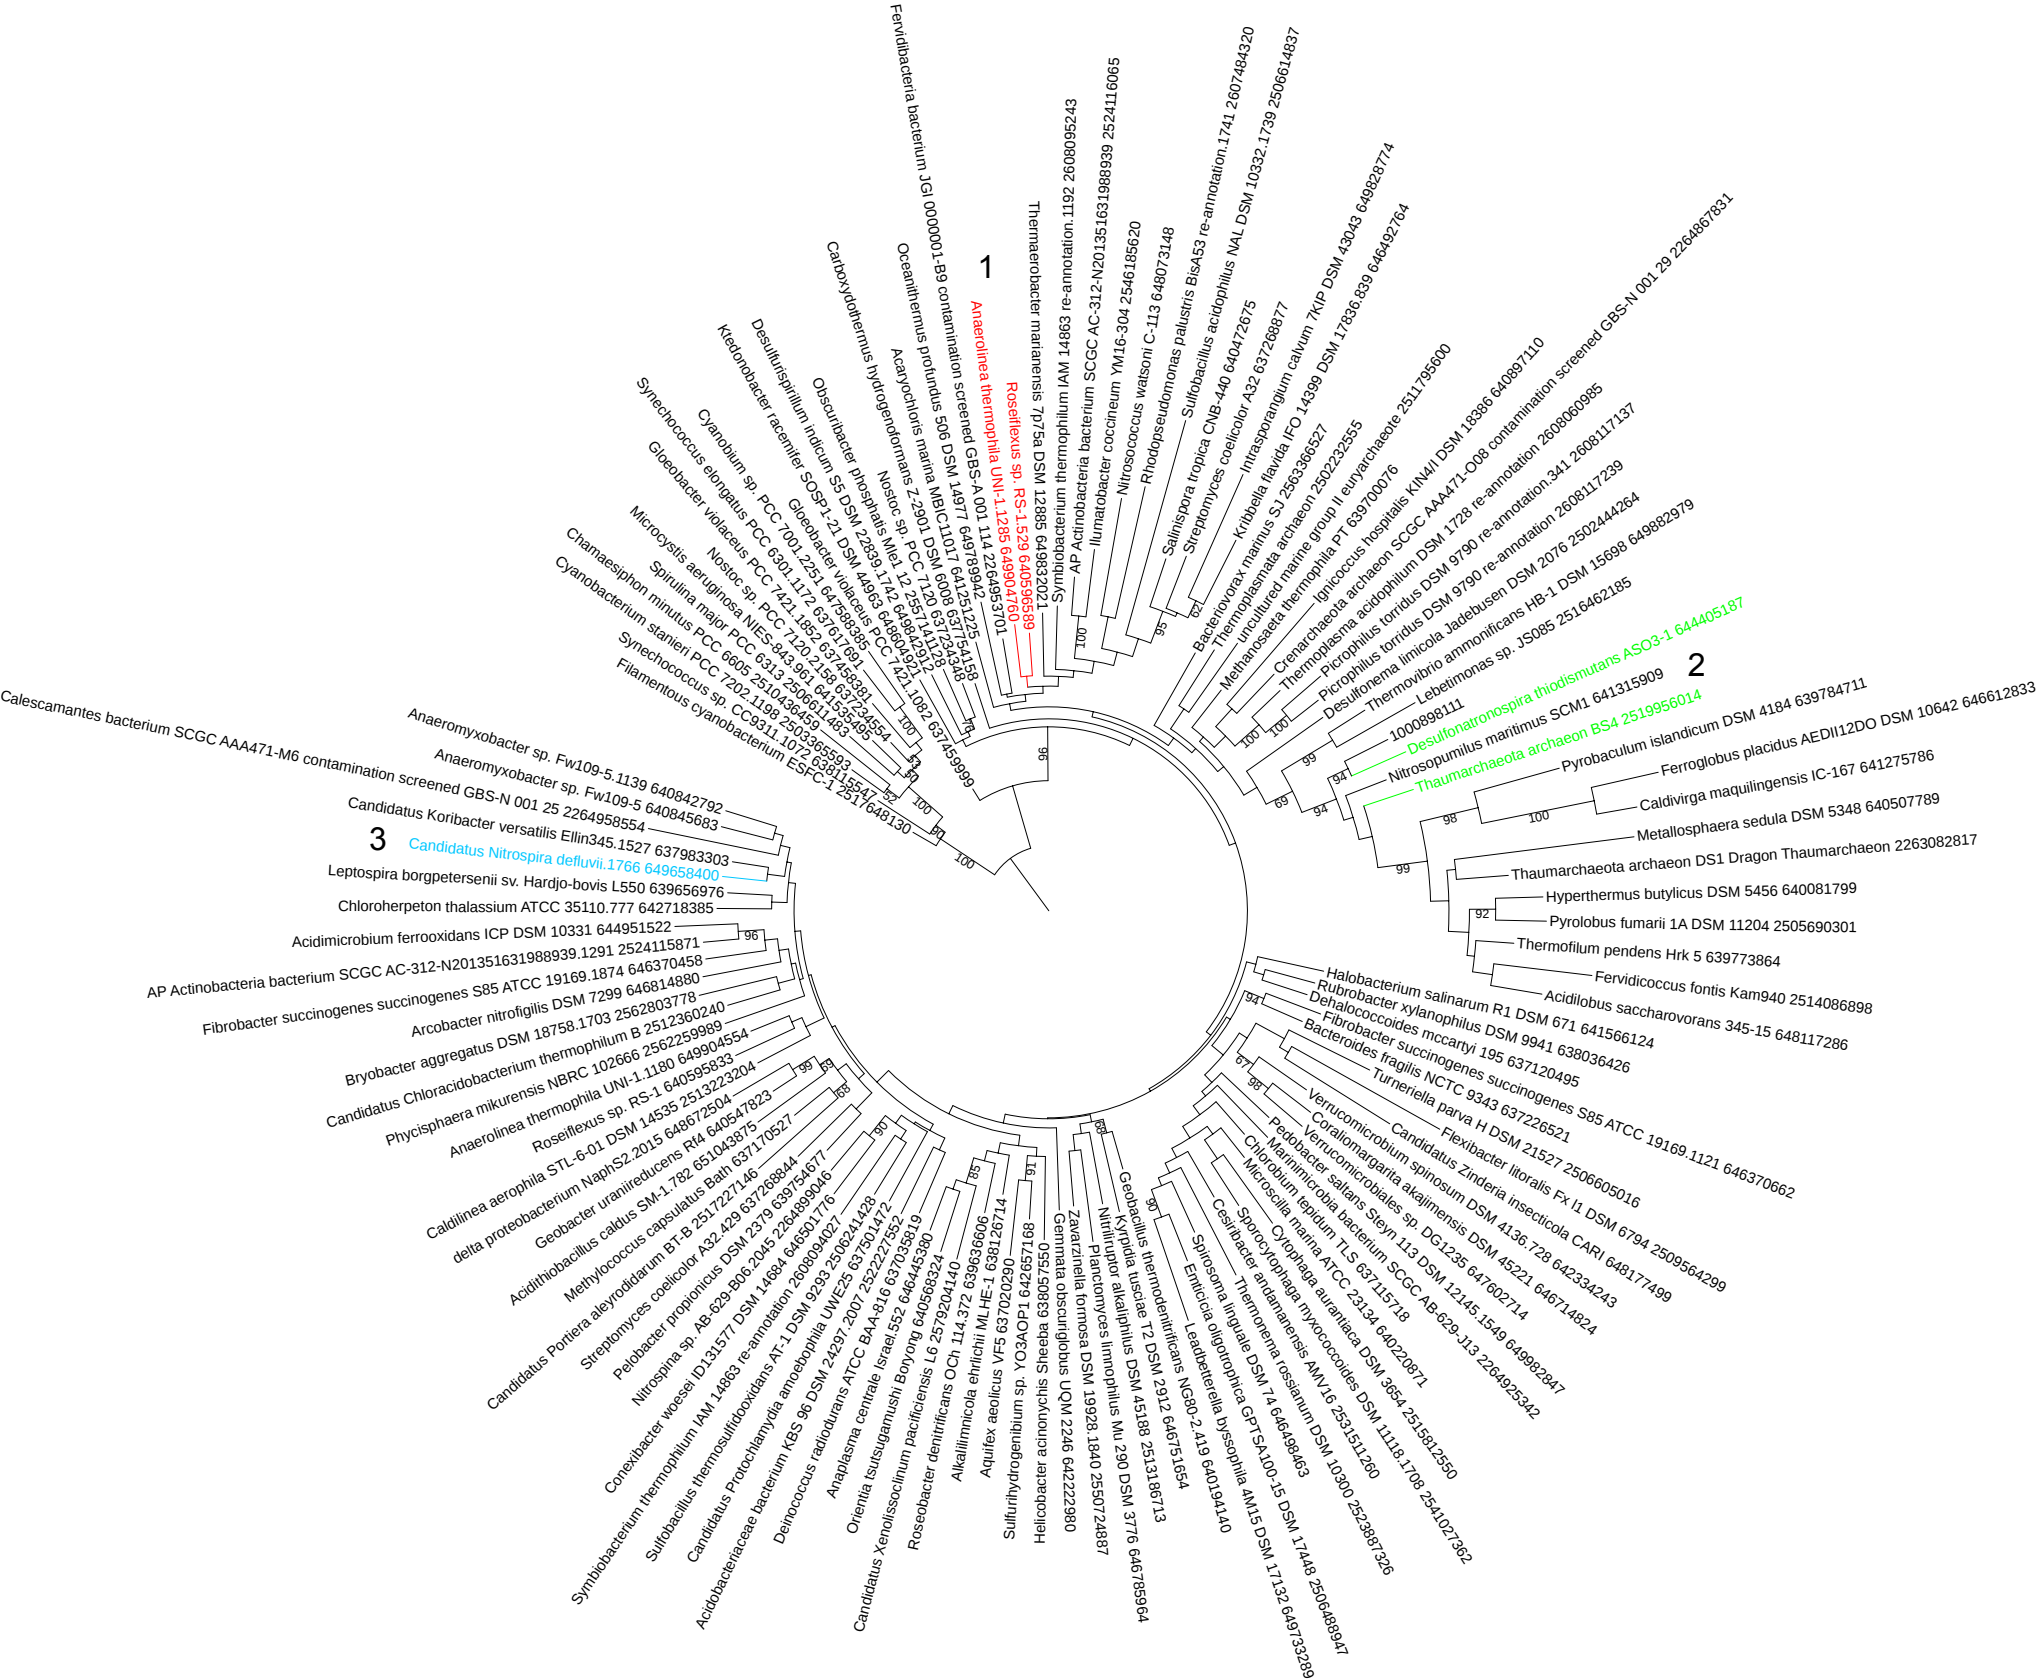

Supplement: 41396_2018_210_MOESM10_ESM.pdf [file 41396_2018_210_MOESM10_ESM.pdf]

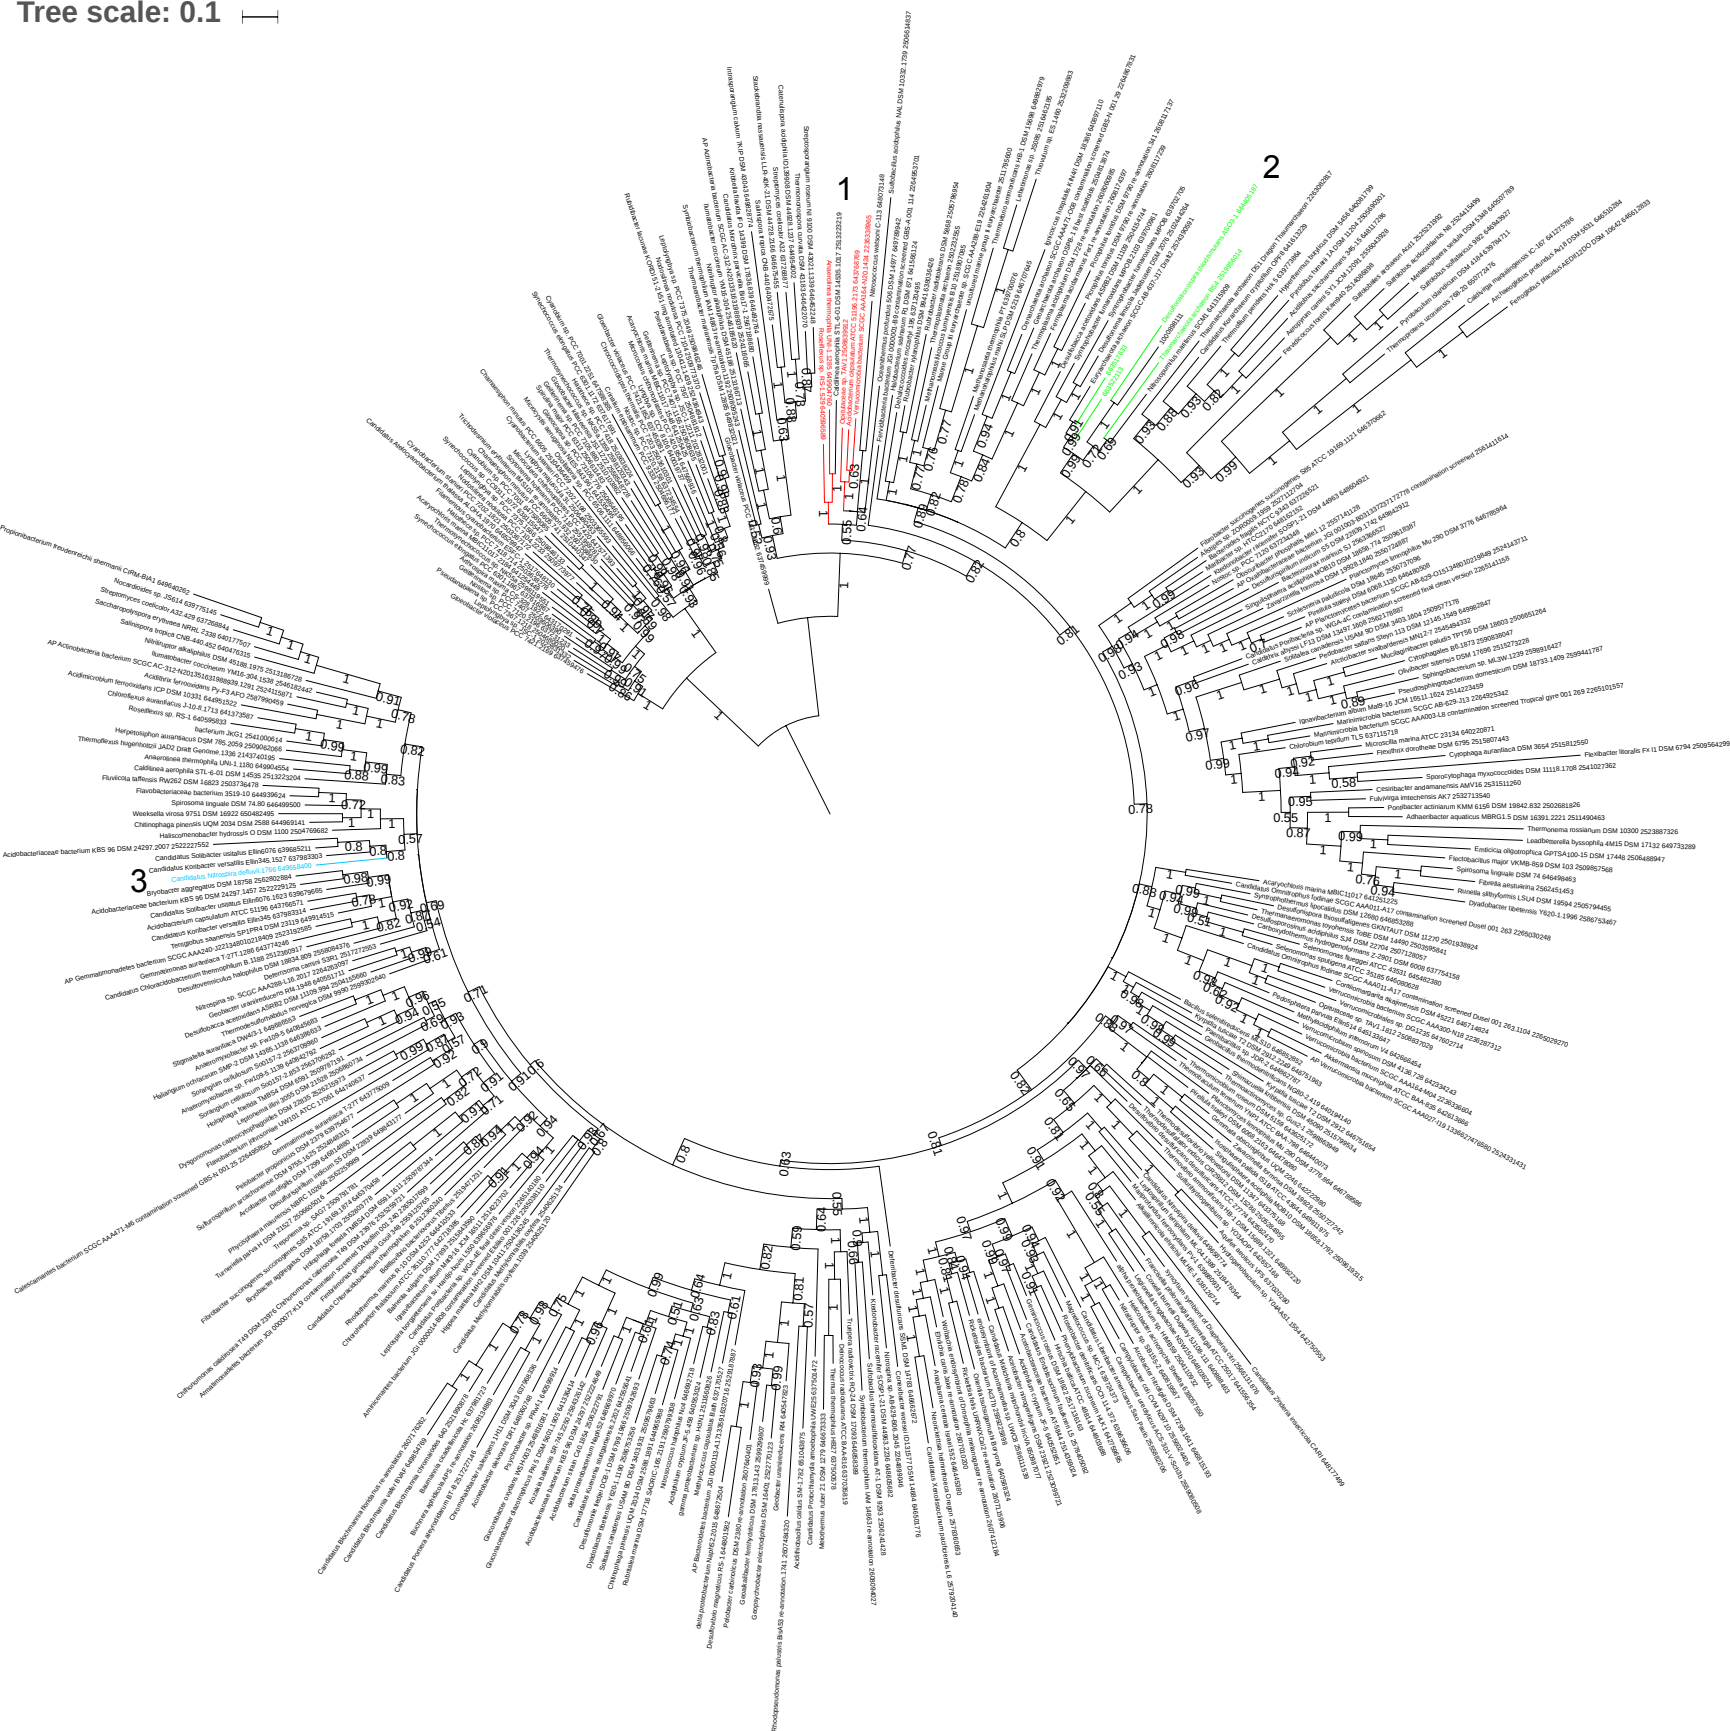

Supplement: 41396_2018_210_MOESM11_ESM.pdf [file 41396_2018_210_MOESM11_ESM.pdf]

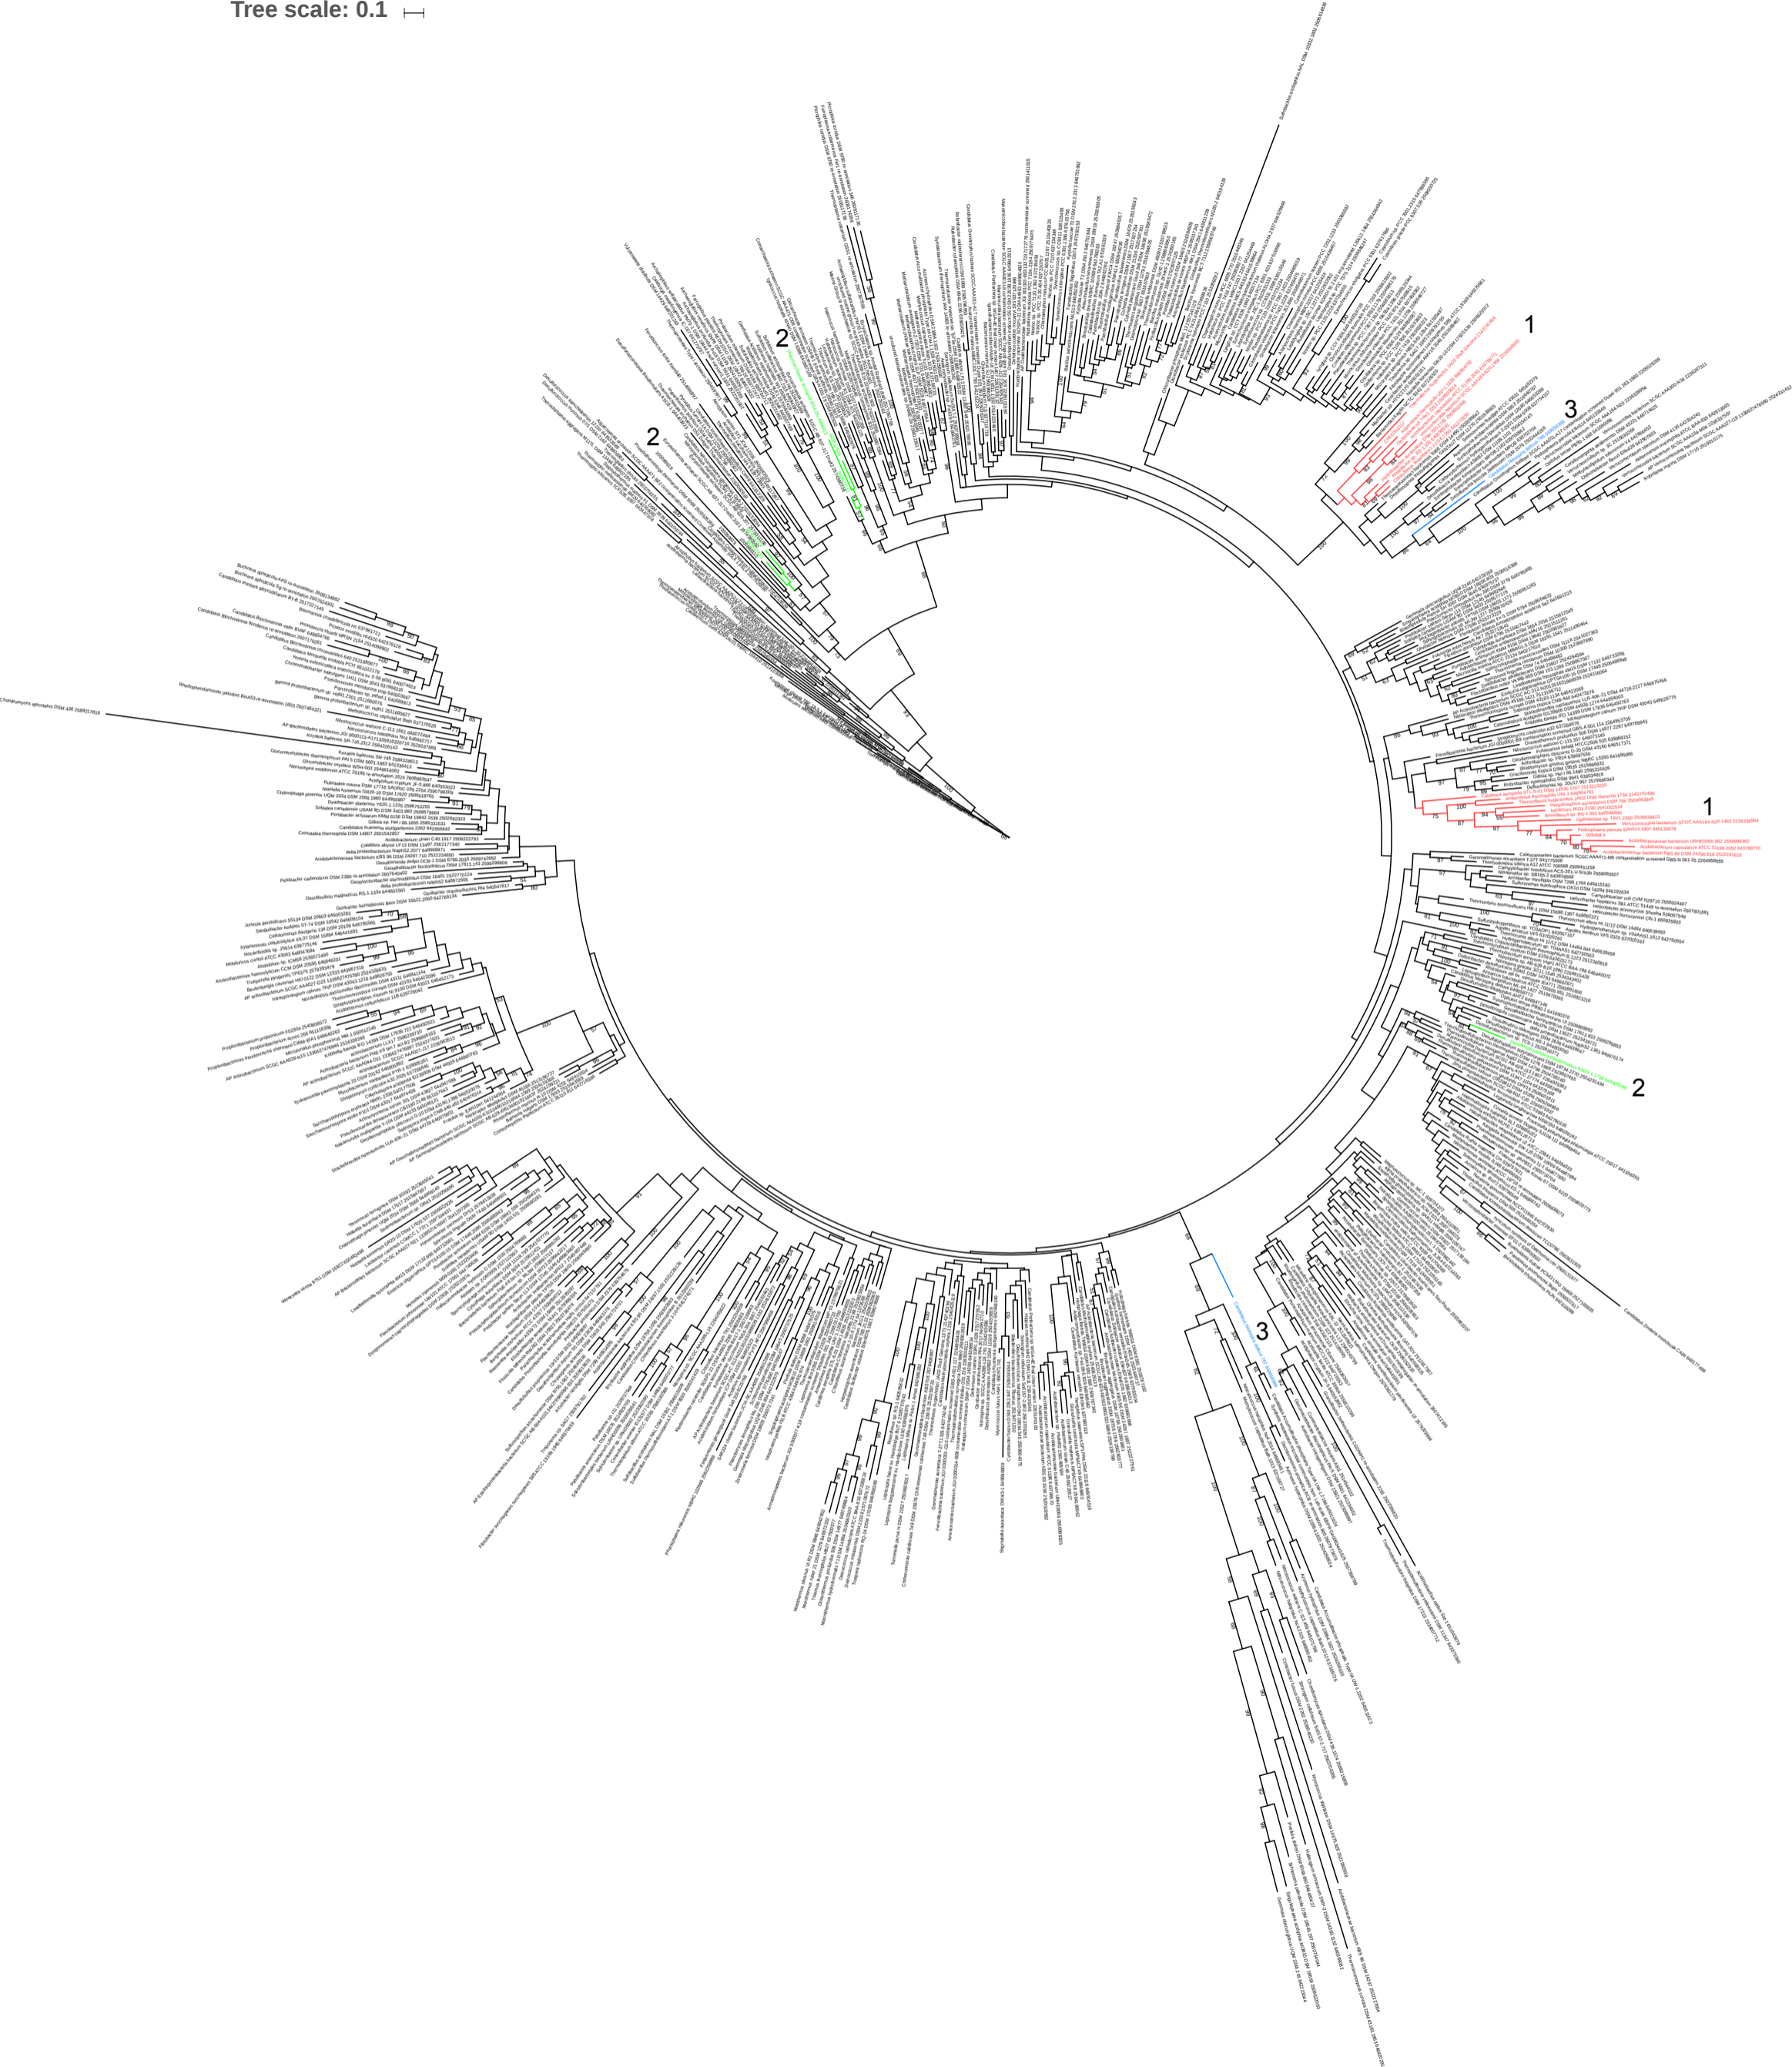

Supplement: 41396_2018_210_MOESM13_ESM.pdf [file 41396_2018_210_MOESM13_ESM.pdf]

Tree scale: 0.1

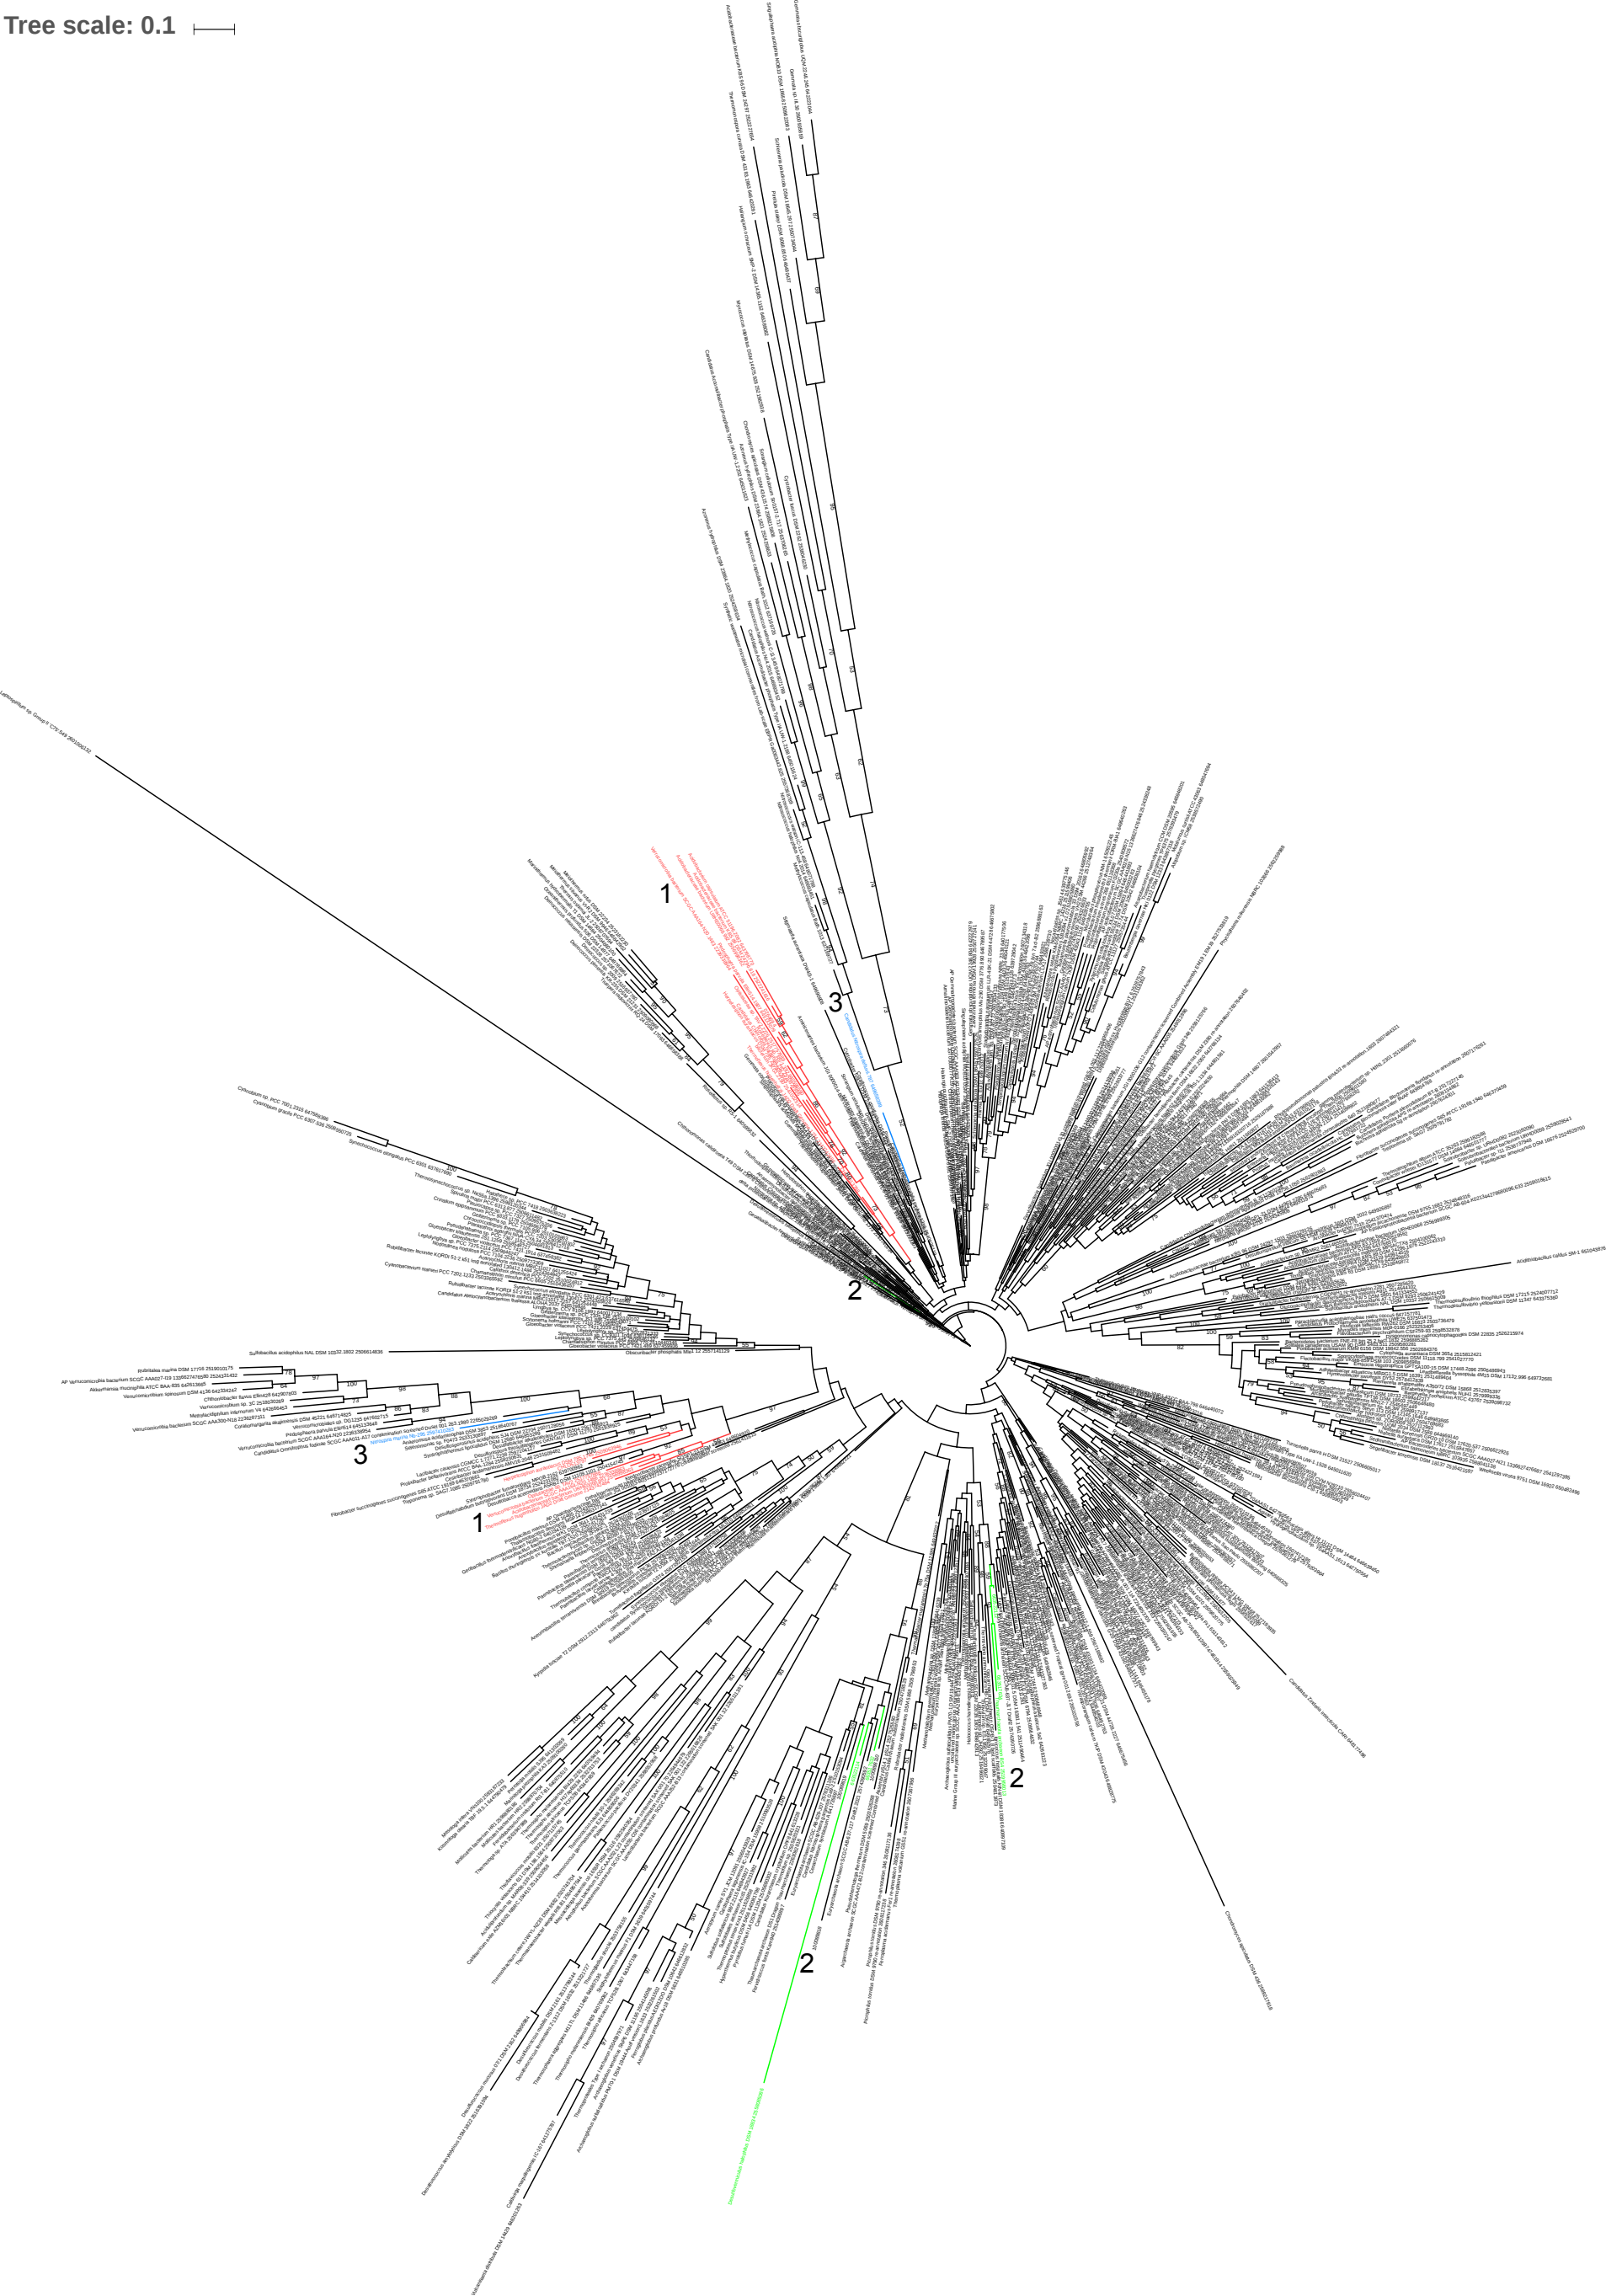

Supplement: 41396_2018_210_MOESM14_ESM.pdf [file 41396_2018_210_MOESM14_ESM.pdf]

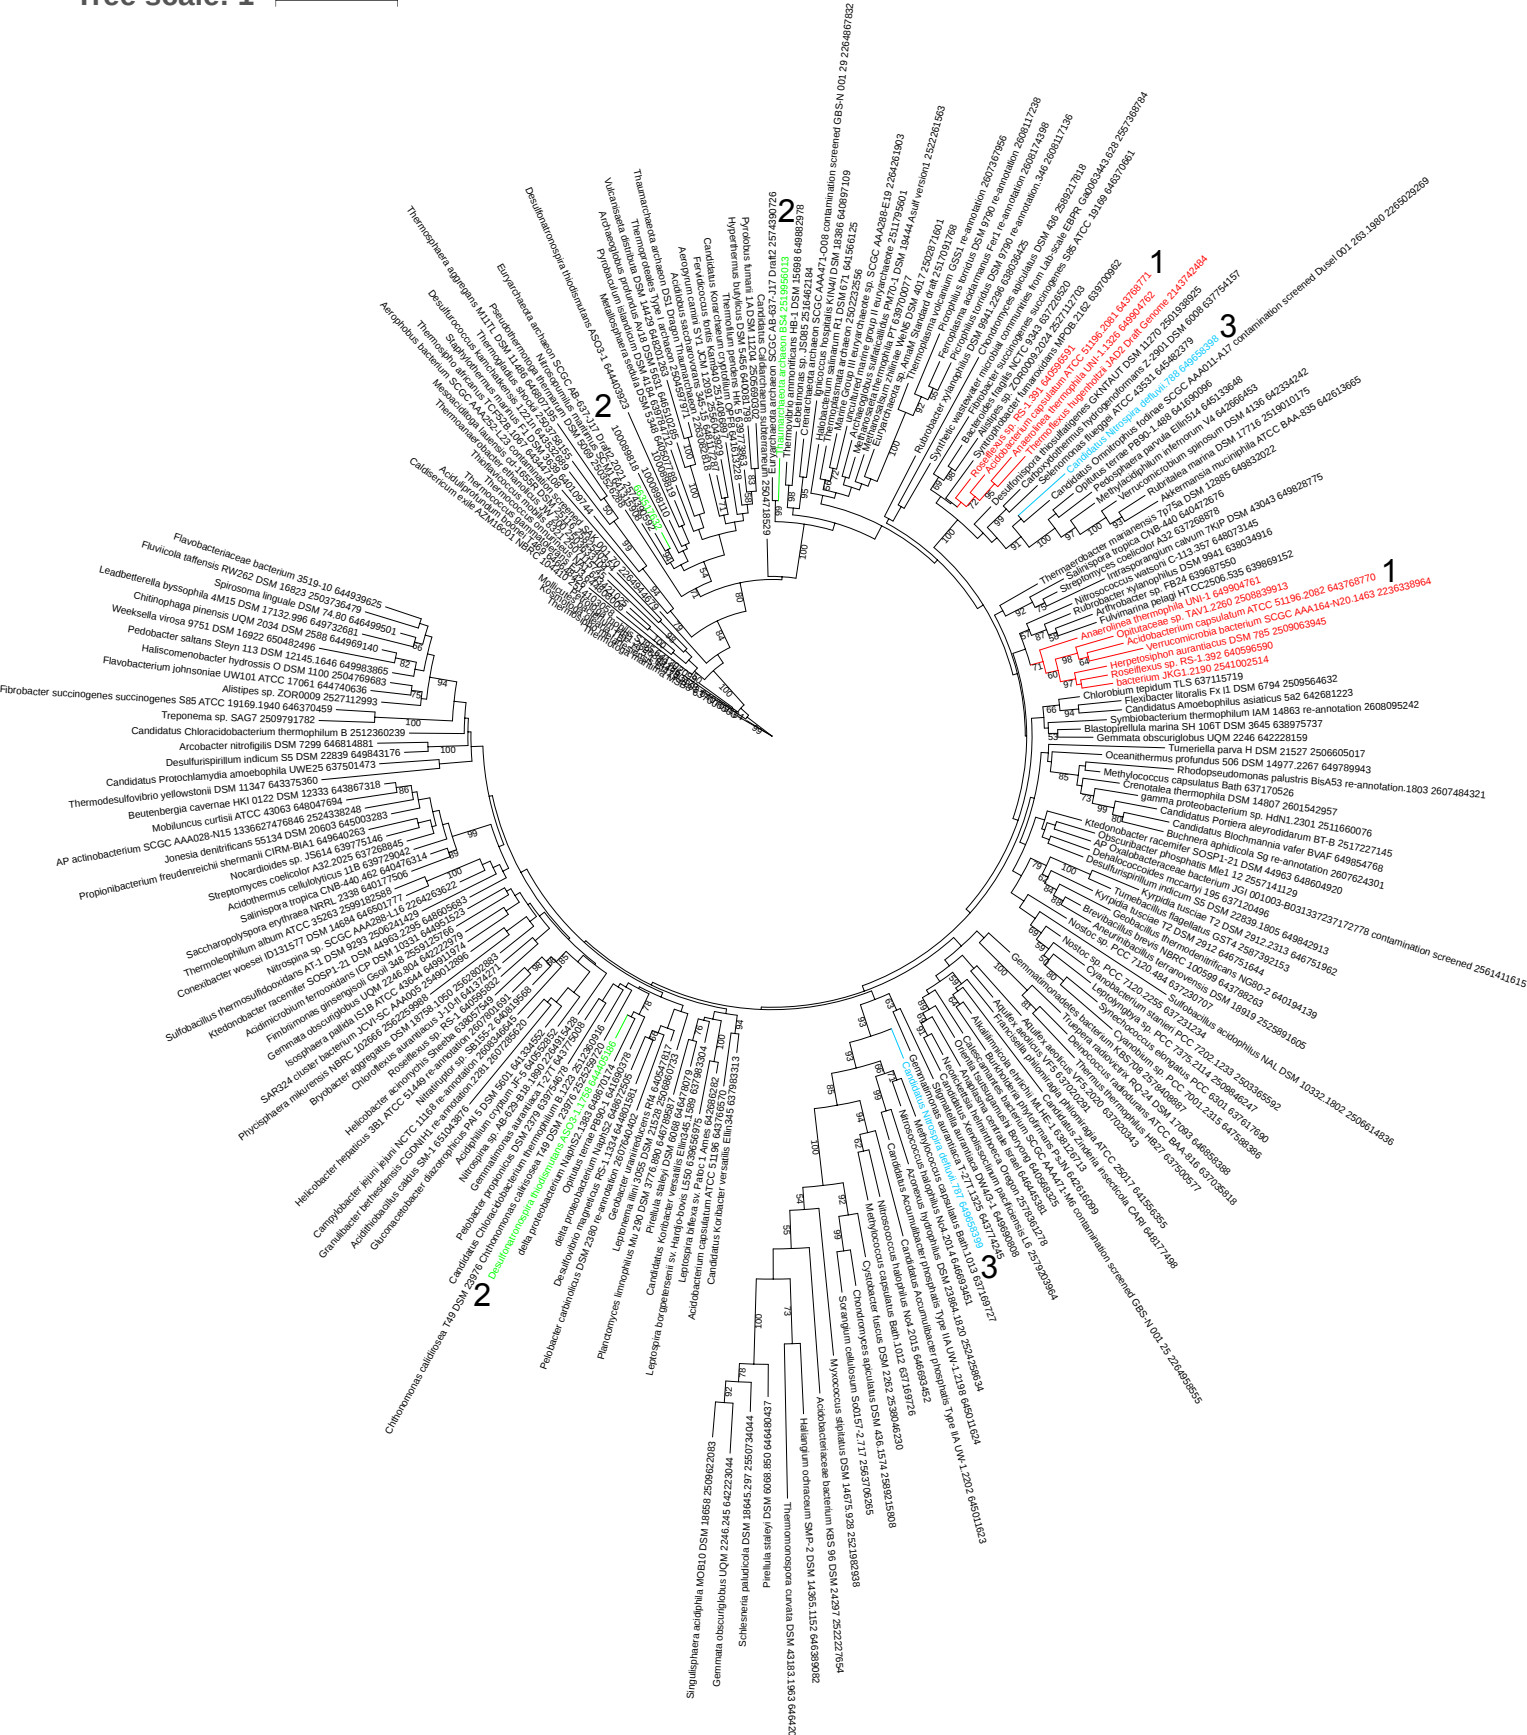

Supplement: 41396_2018_210_MOESM18_ESM.pdf [file 41396_2018_210_MOESM18_ESM.pdf]

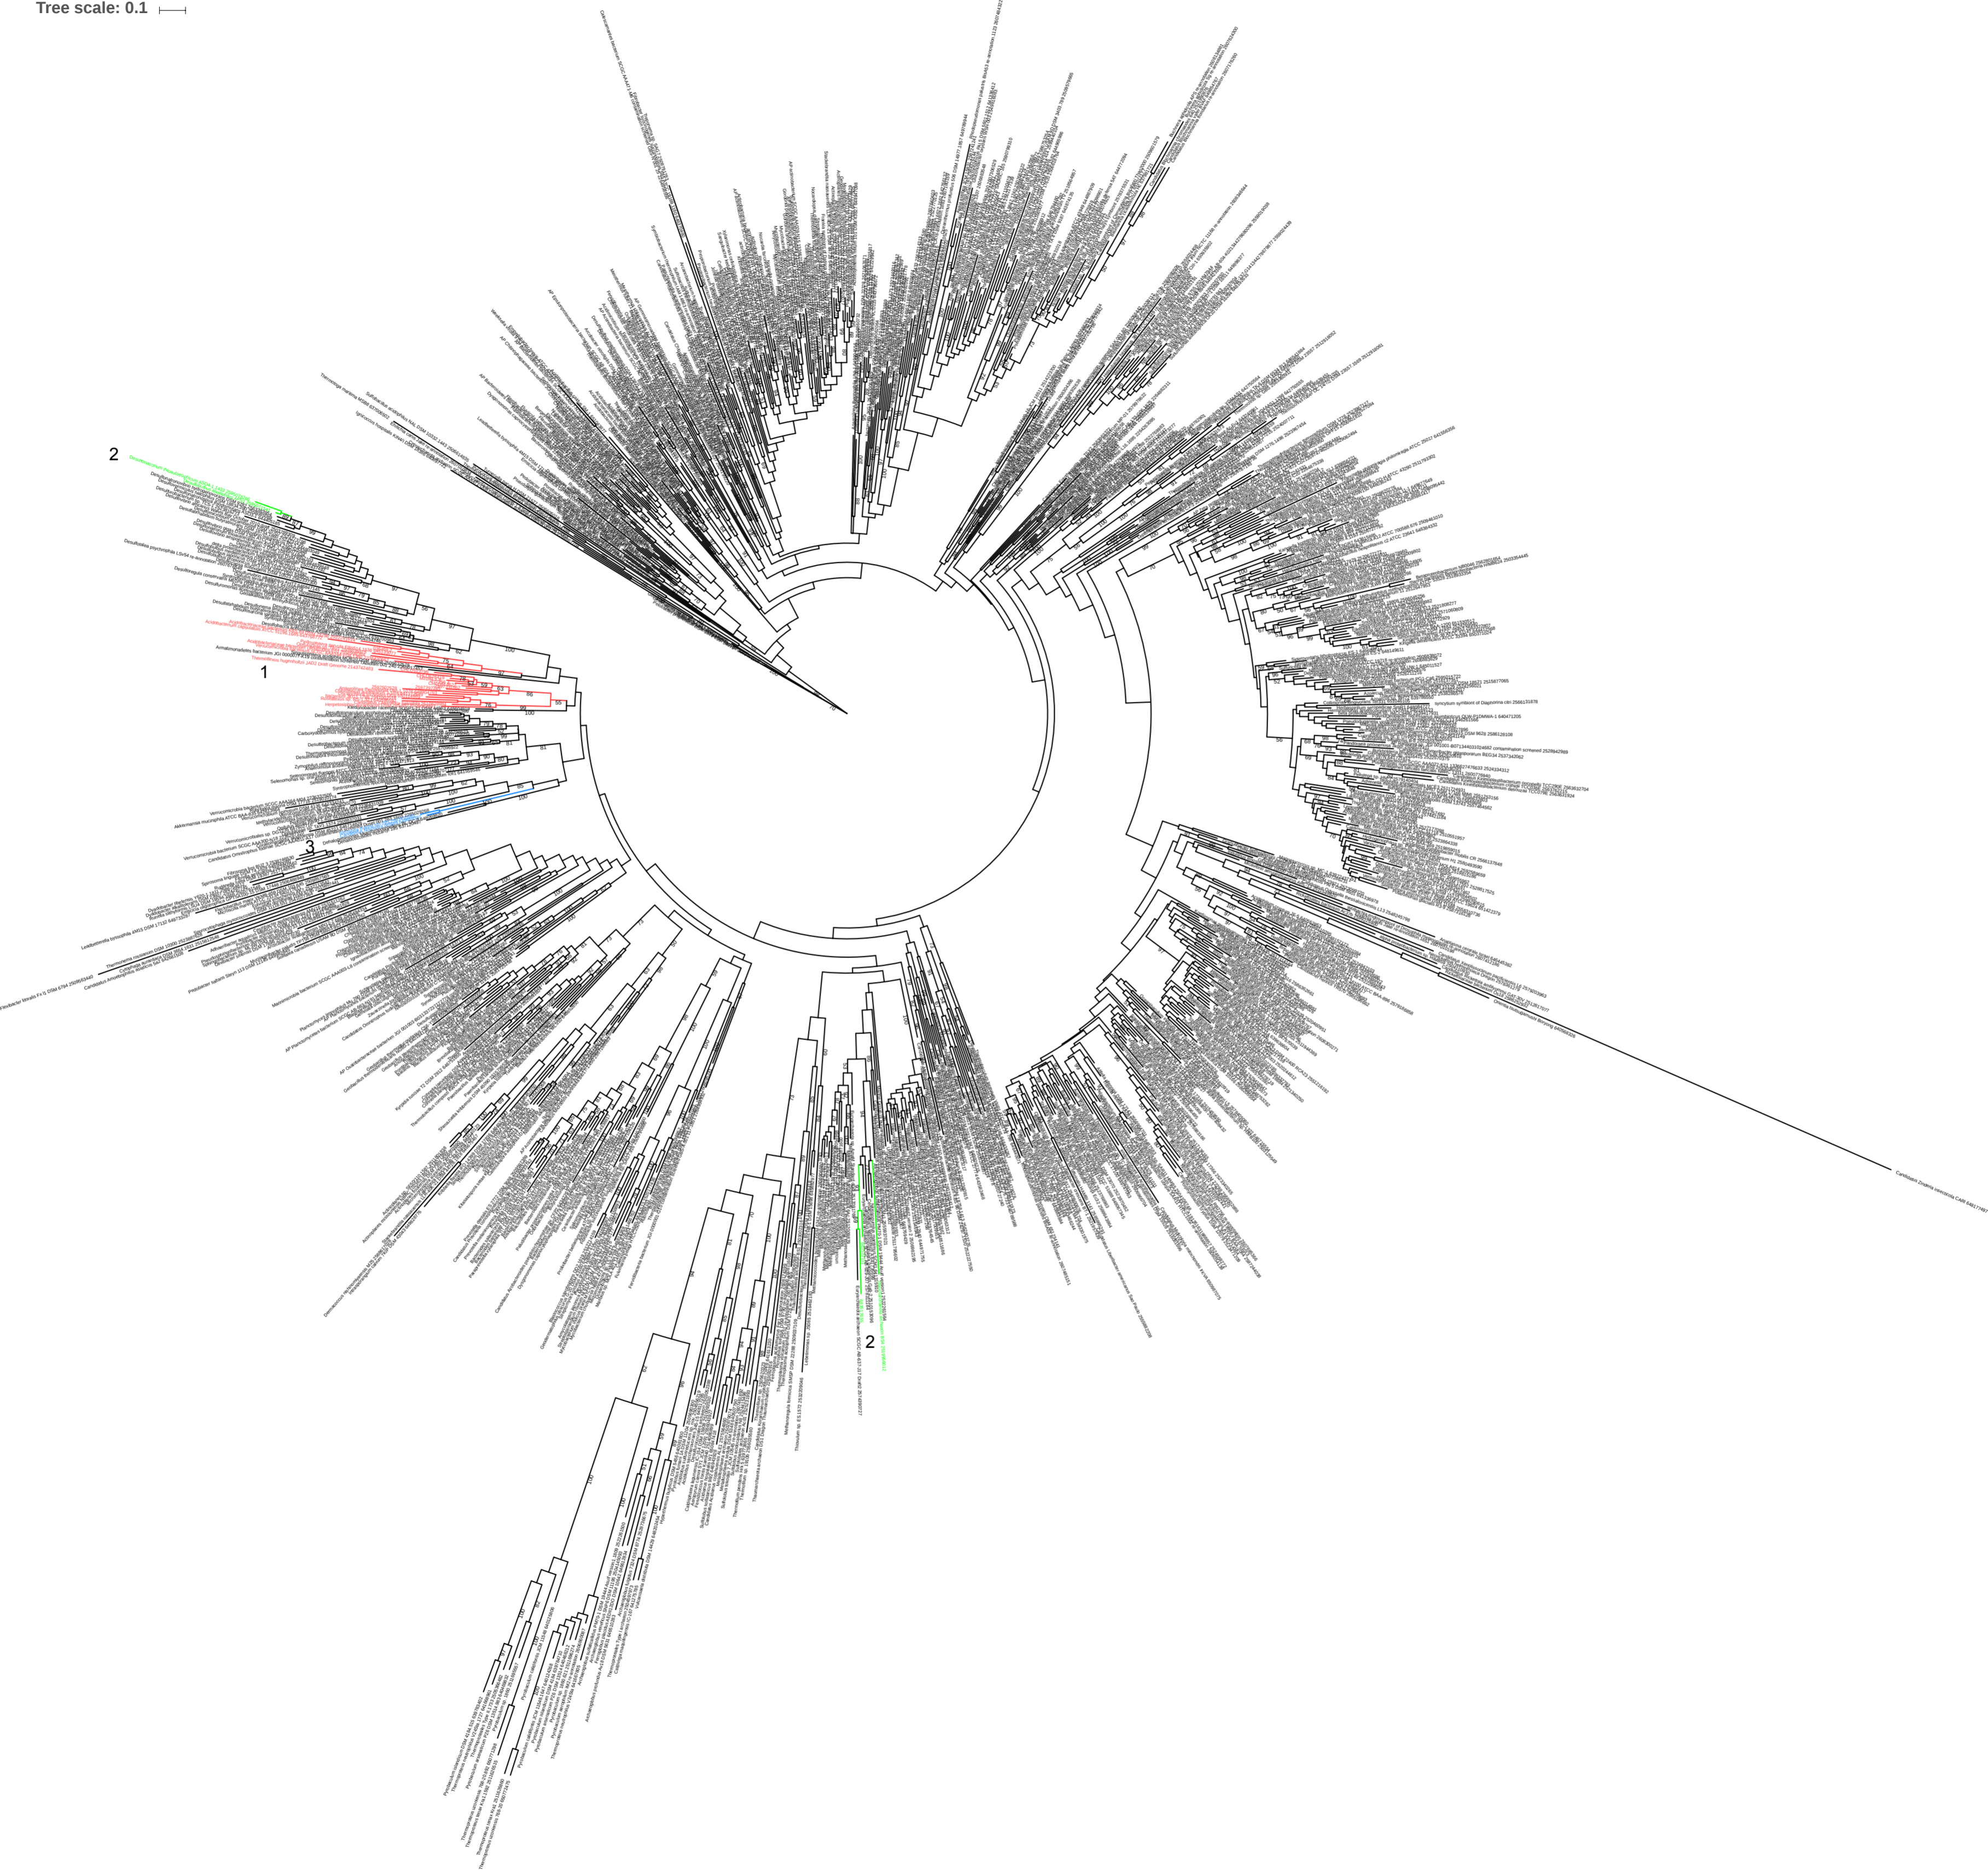

Supplement: 41396_2018_210_MOESM22_ESM.pdf [file 41396_2018_210_MOESM22_ESM.pdf]

Tree scale: 0.1

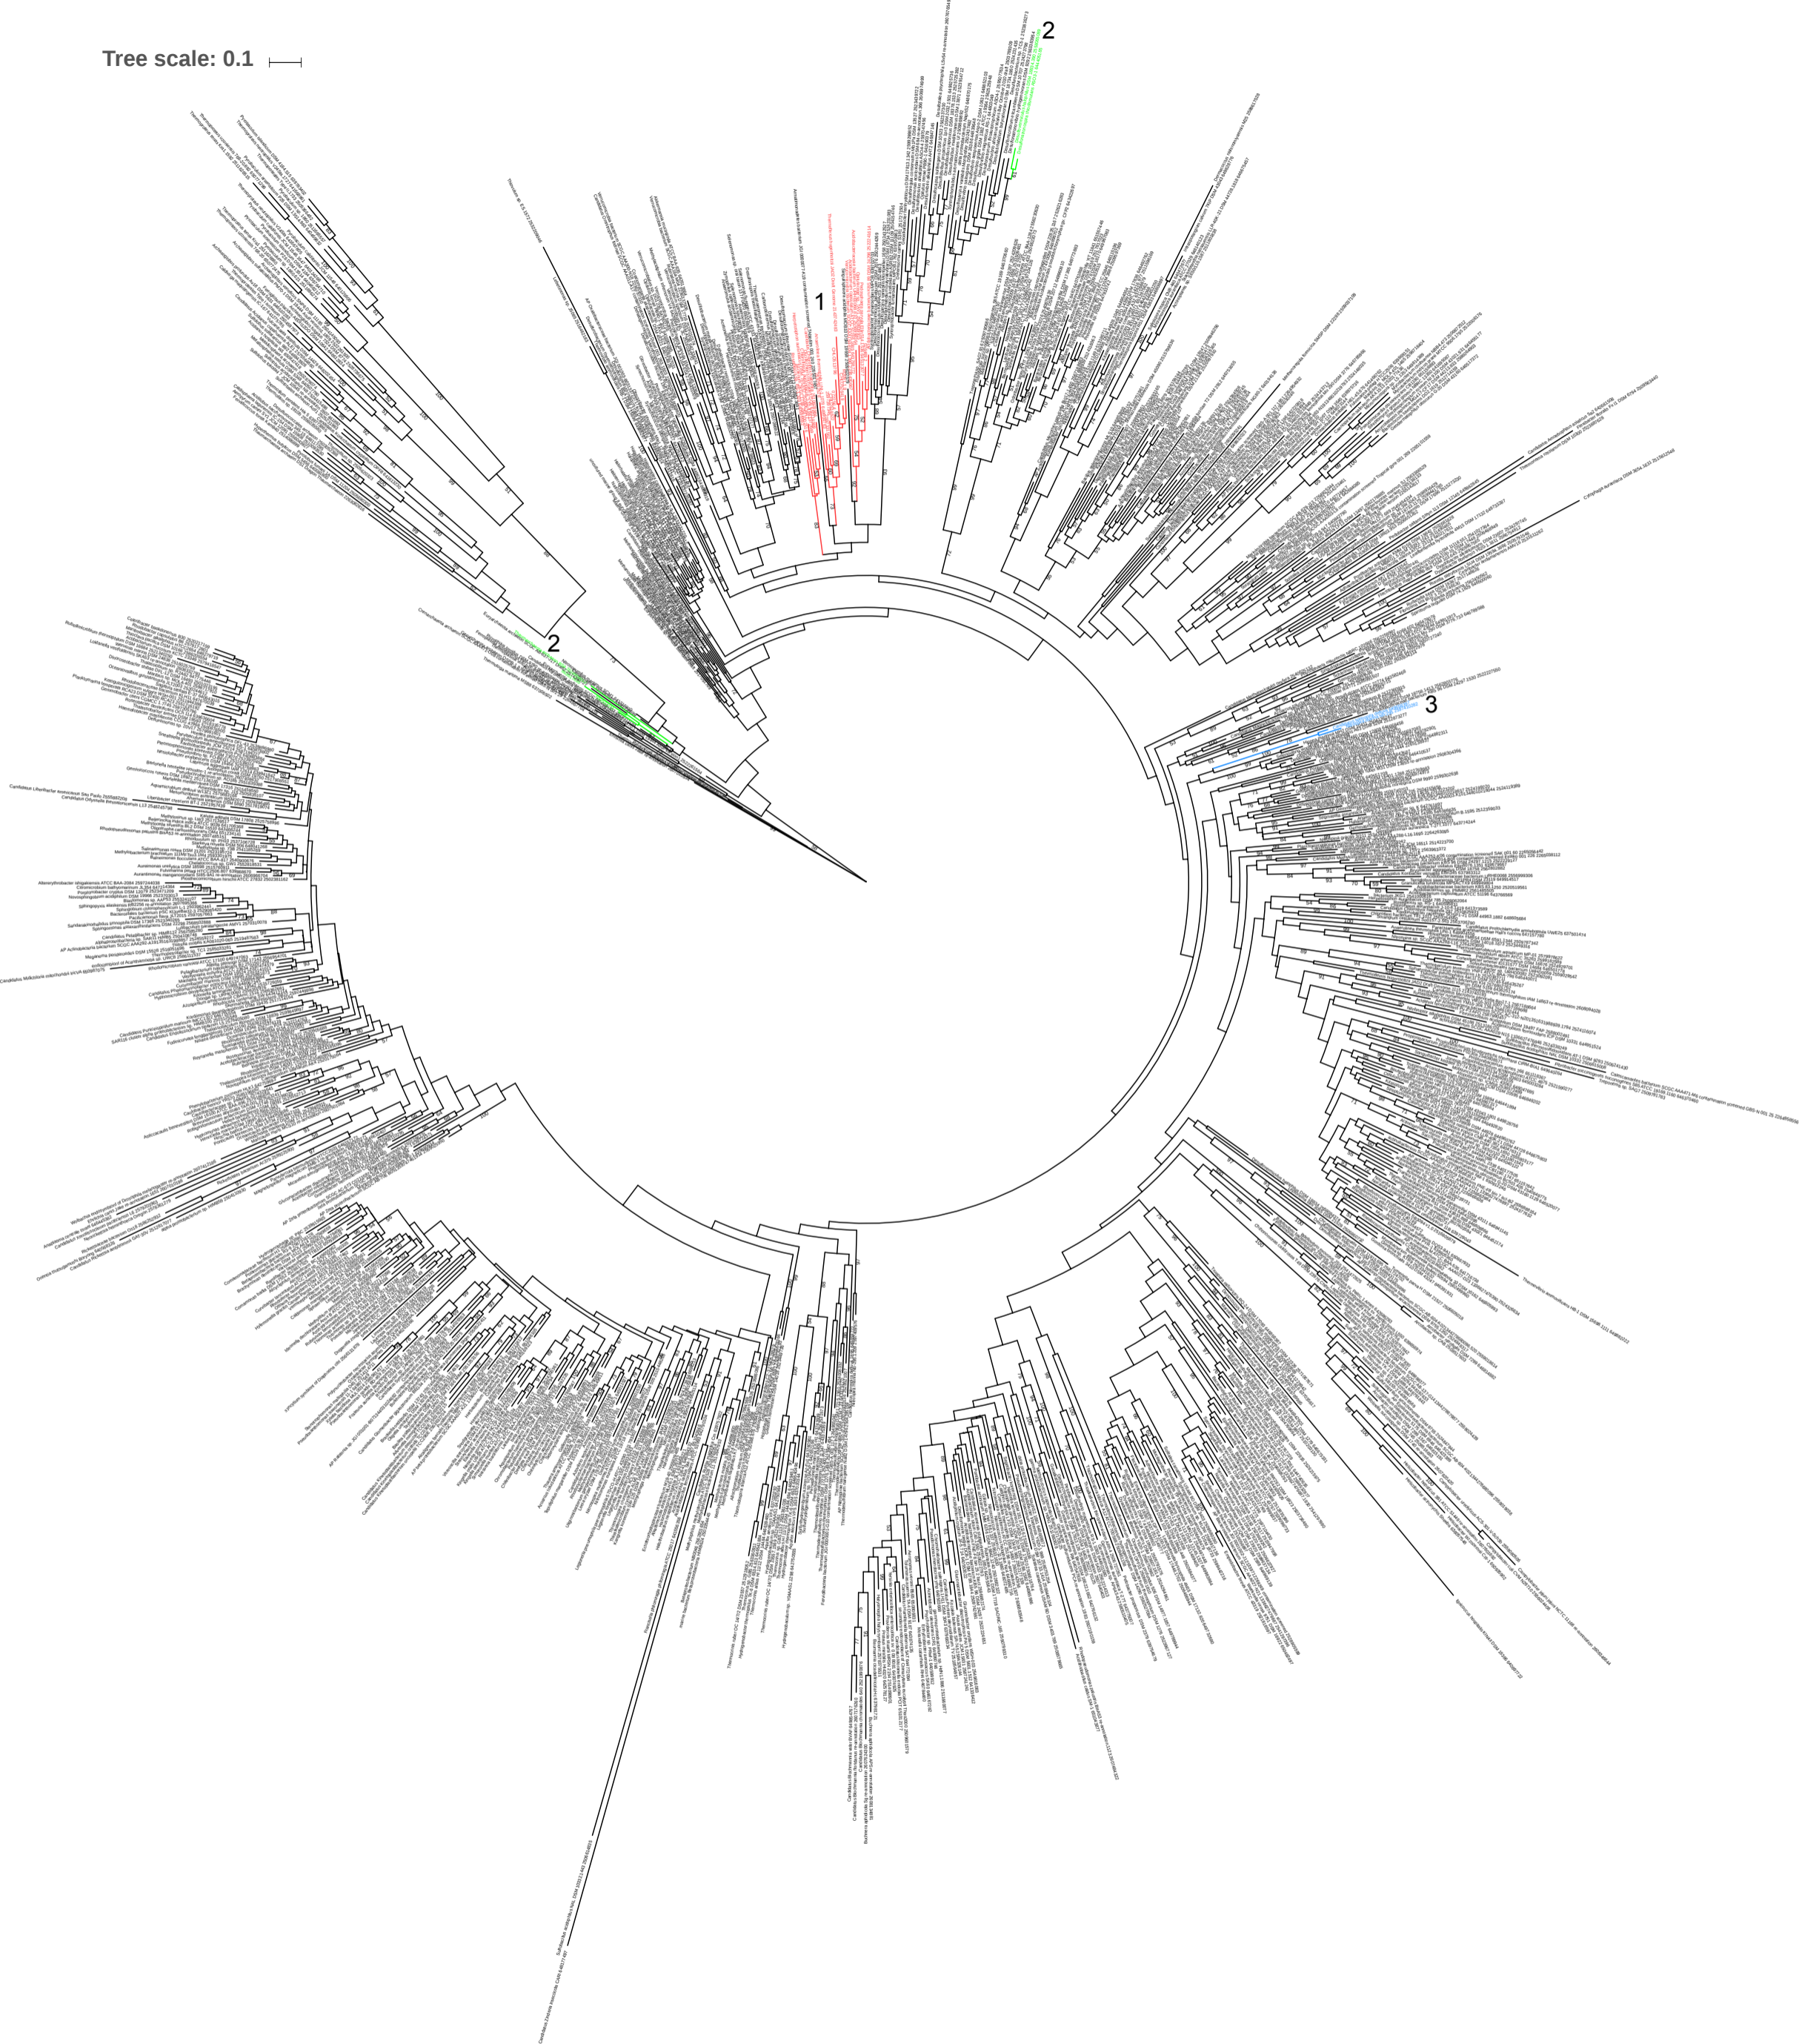

Supplement: 41396_2018_210_MOESM23_ESM.pdf [file 41396_2018_210_MOESM23_ESM.pdf]

Tree scale: 0.1

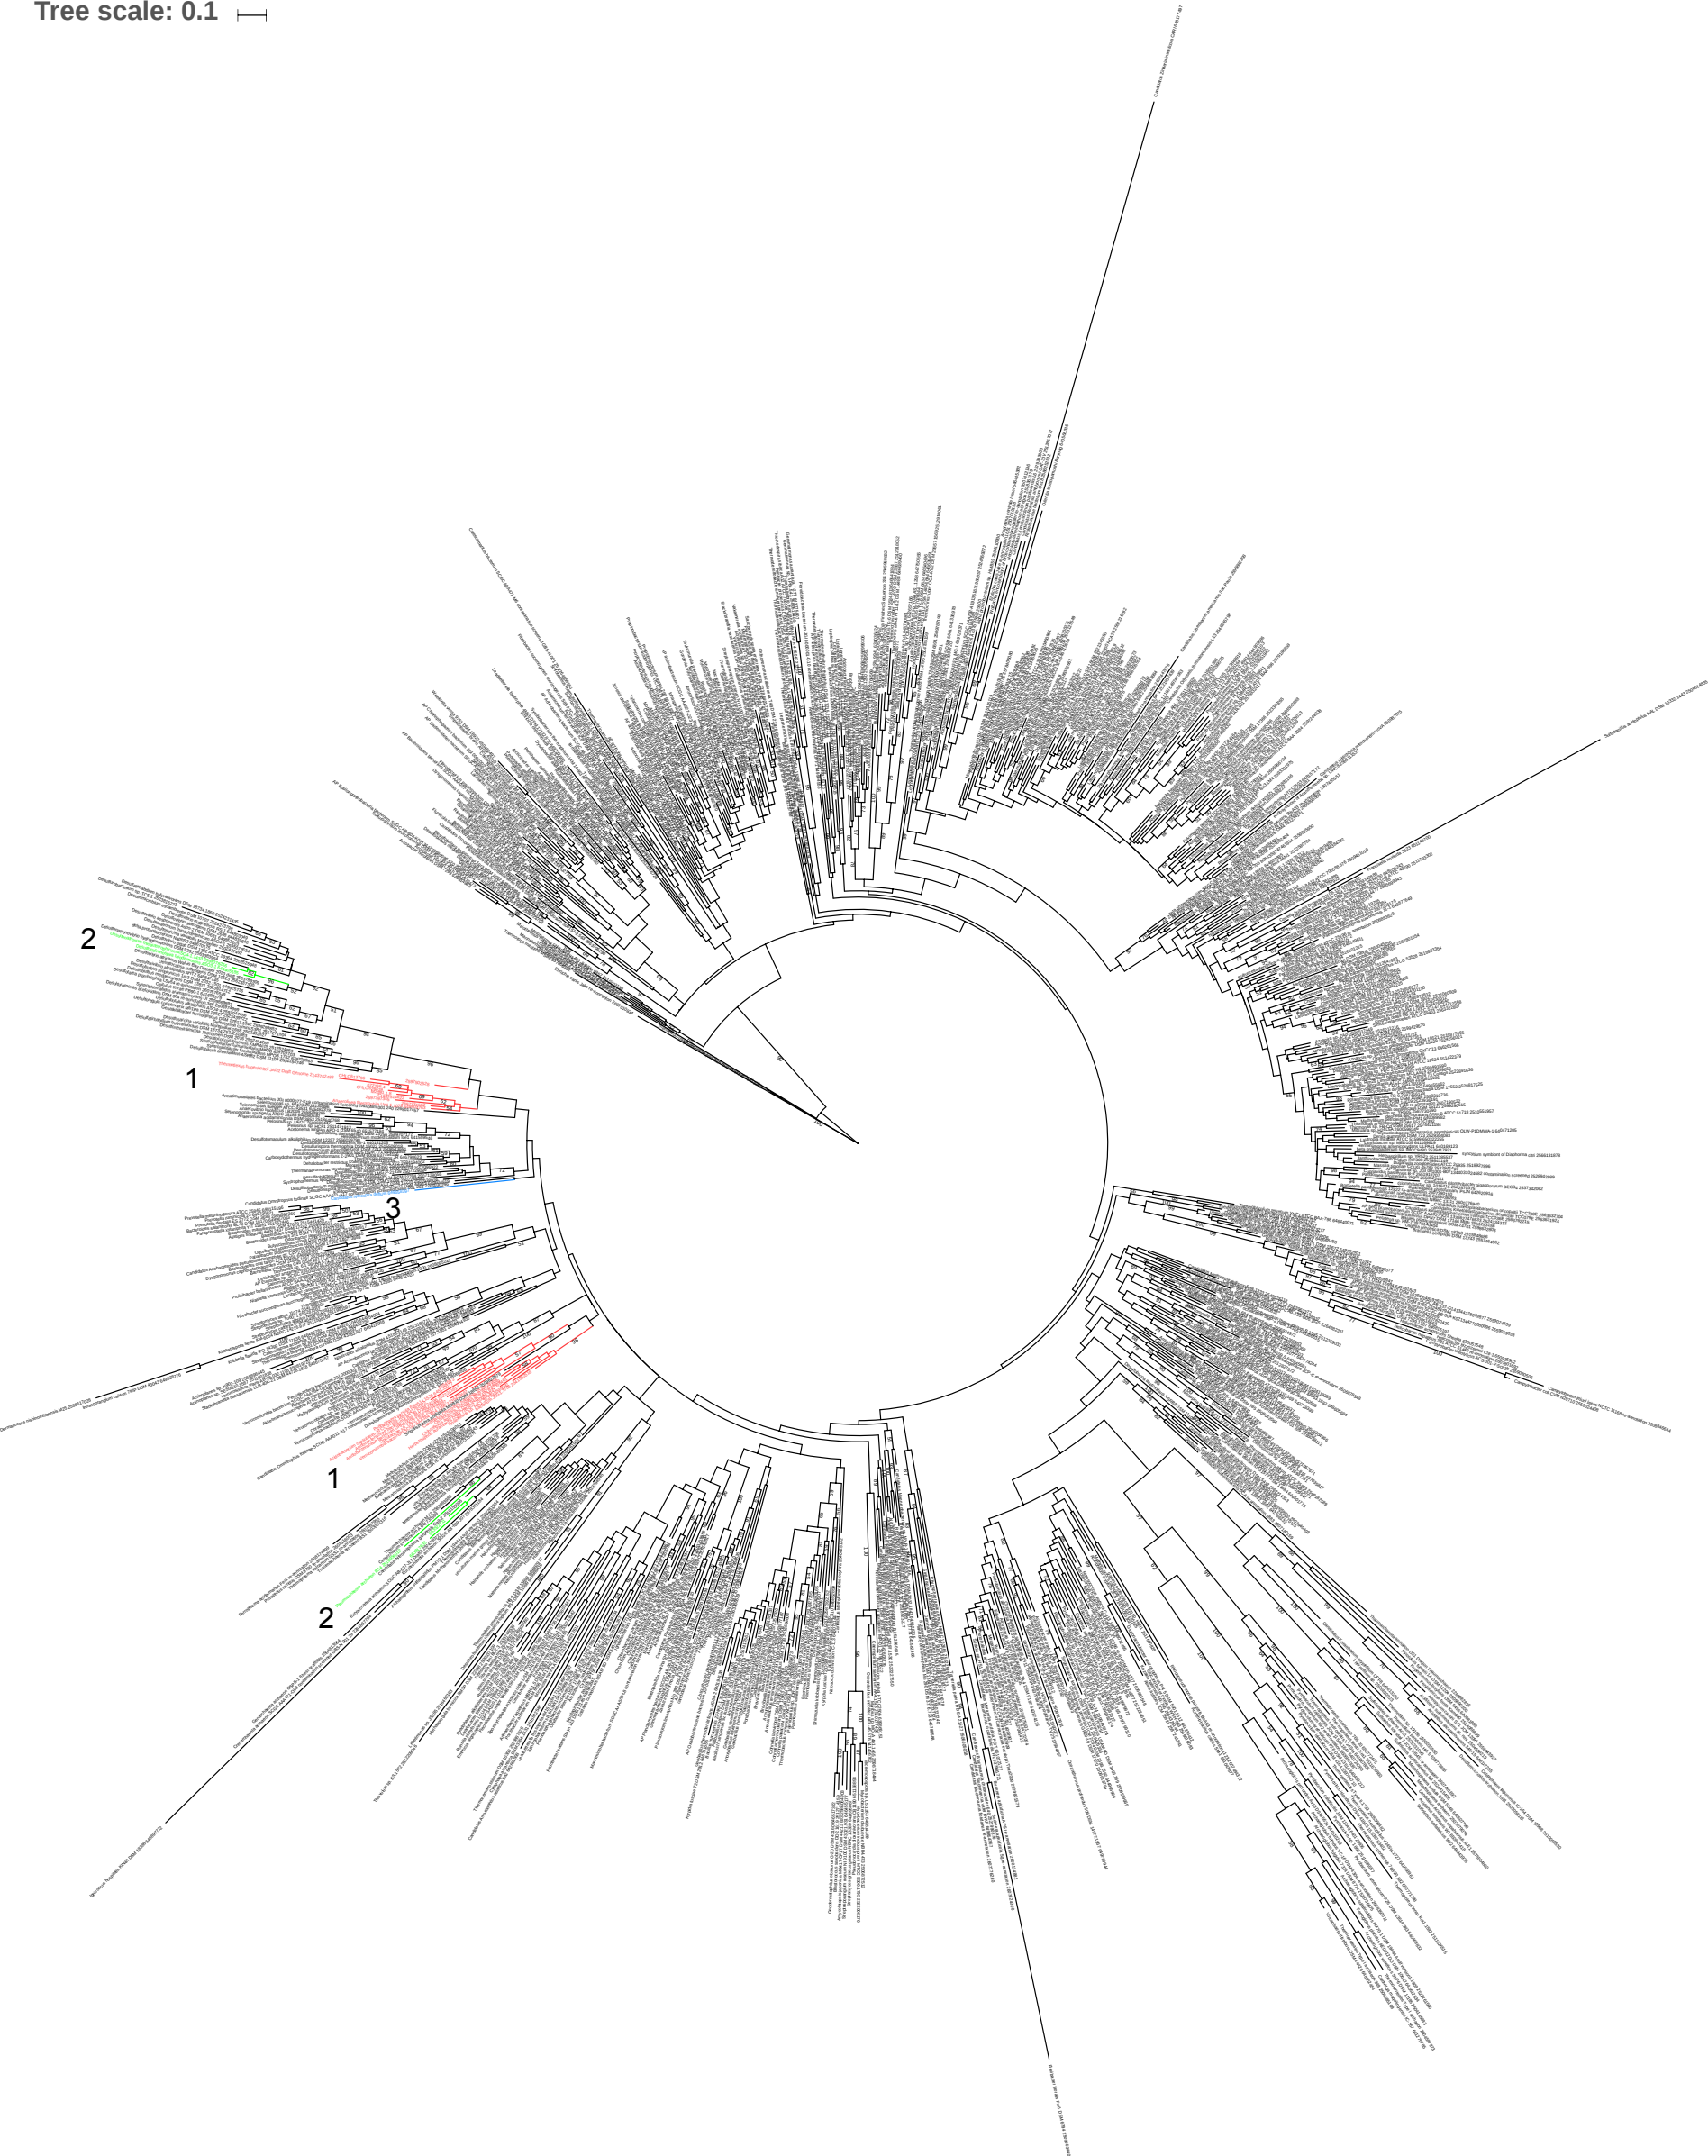

Supplement: 41396_2018_210_MOESM24_ESM.pdf [file 41396_2018_210_MOESM24_ESM.pdf]

Tree scale: 0.1

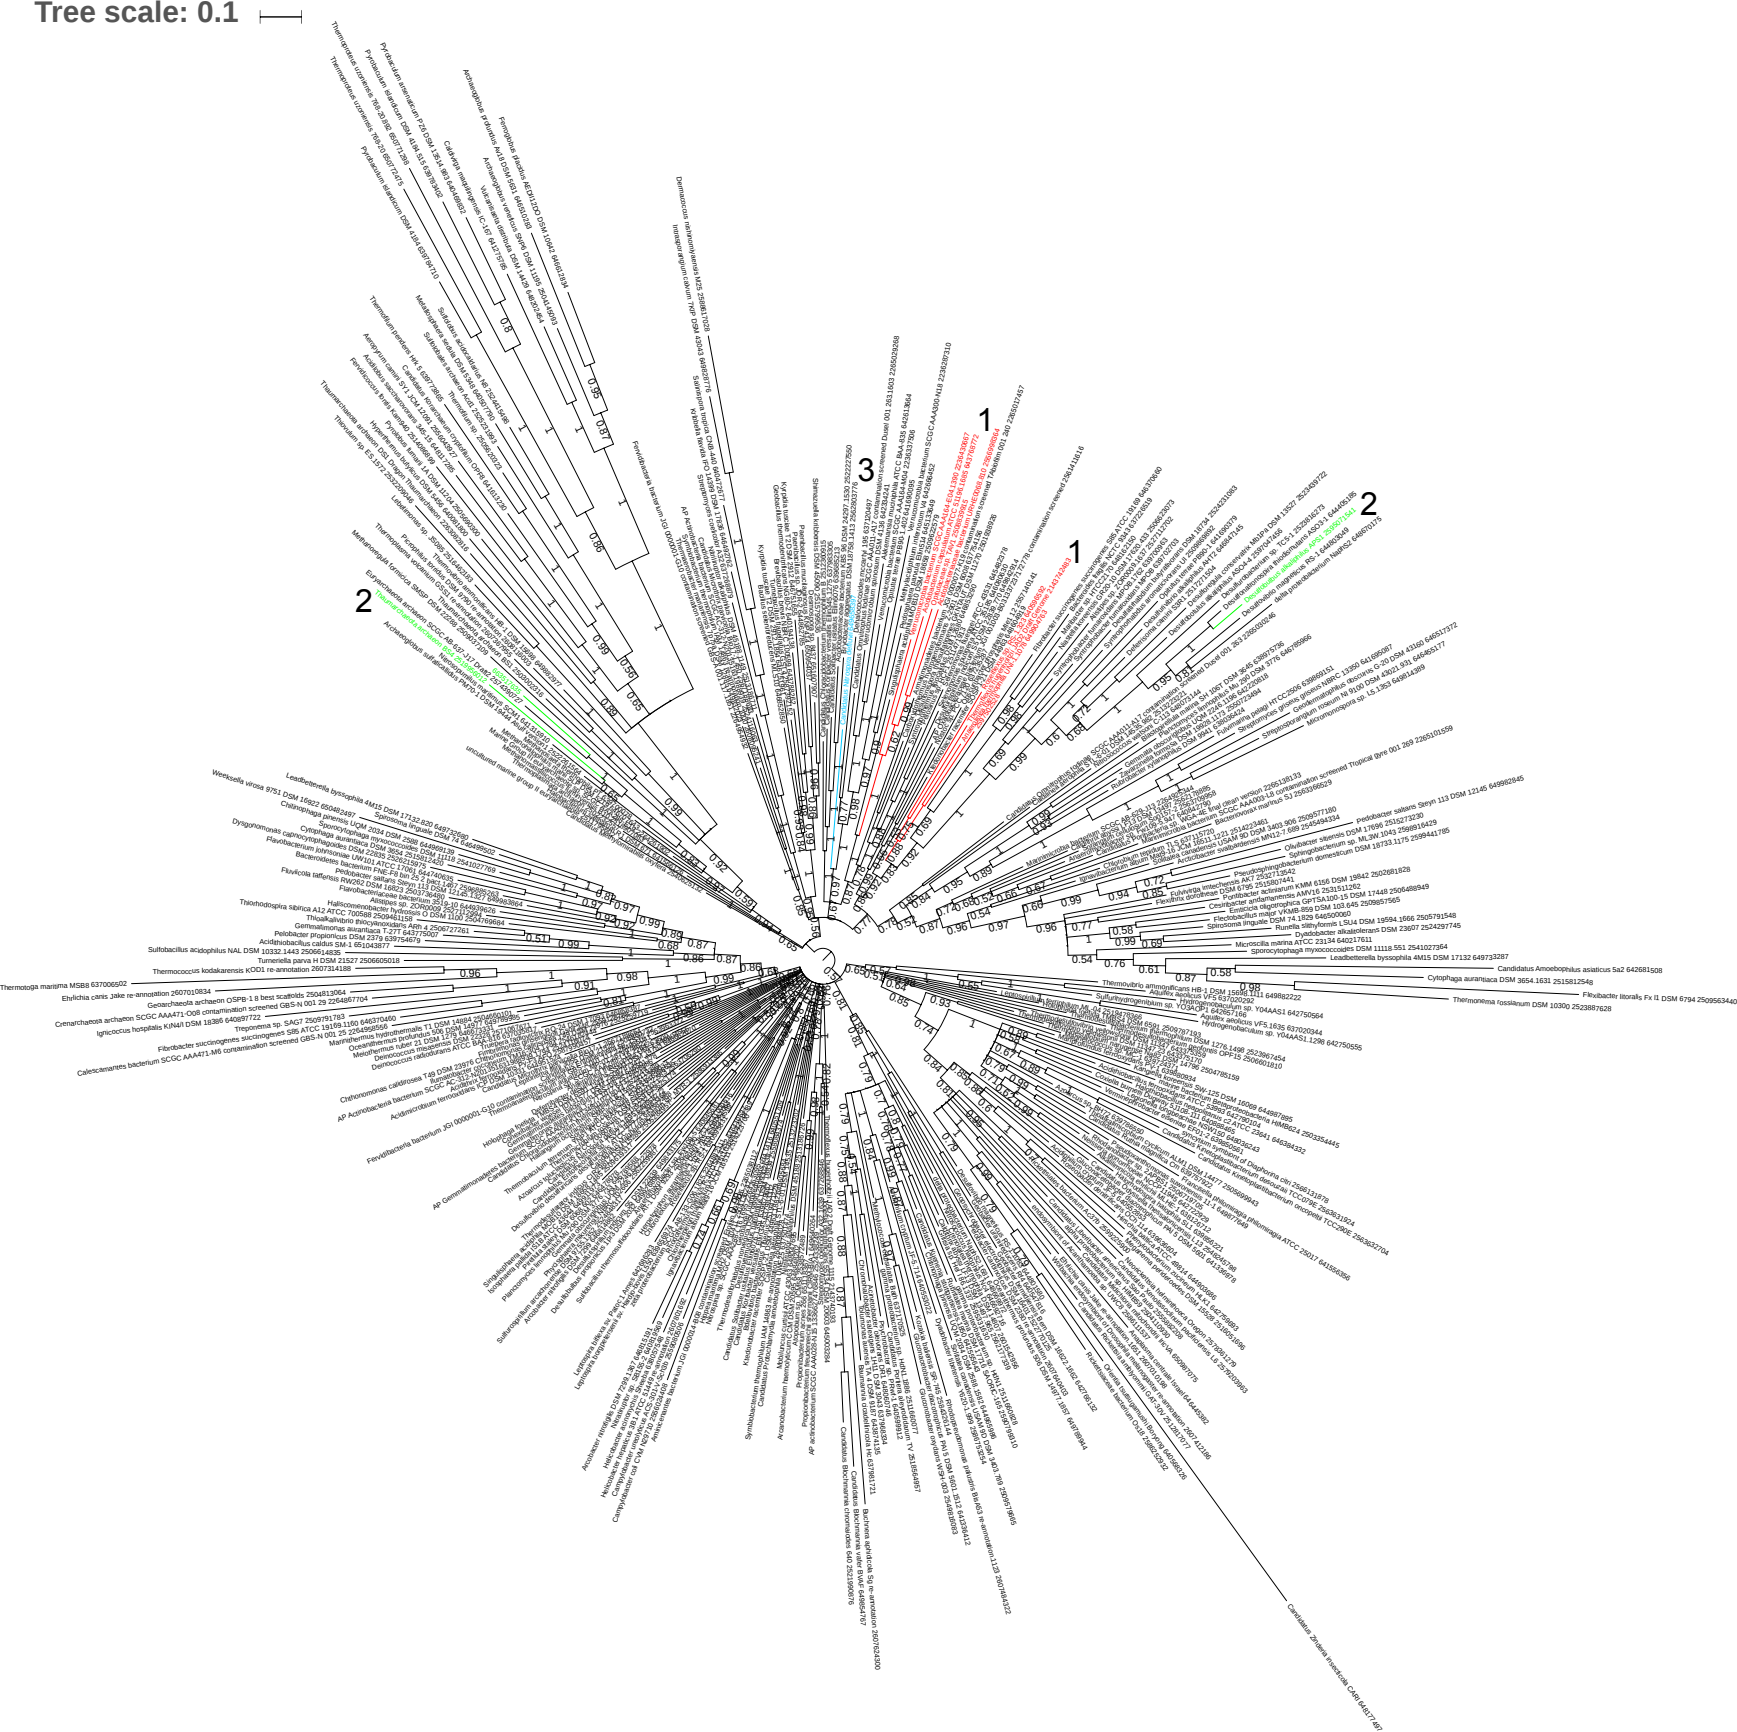

Supplement: 41396_2018_210_MOESM25_ESM.pdf [file 41396_2018_210_MOESM25_ESM.pdf]

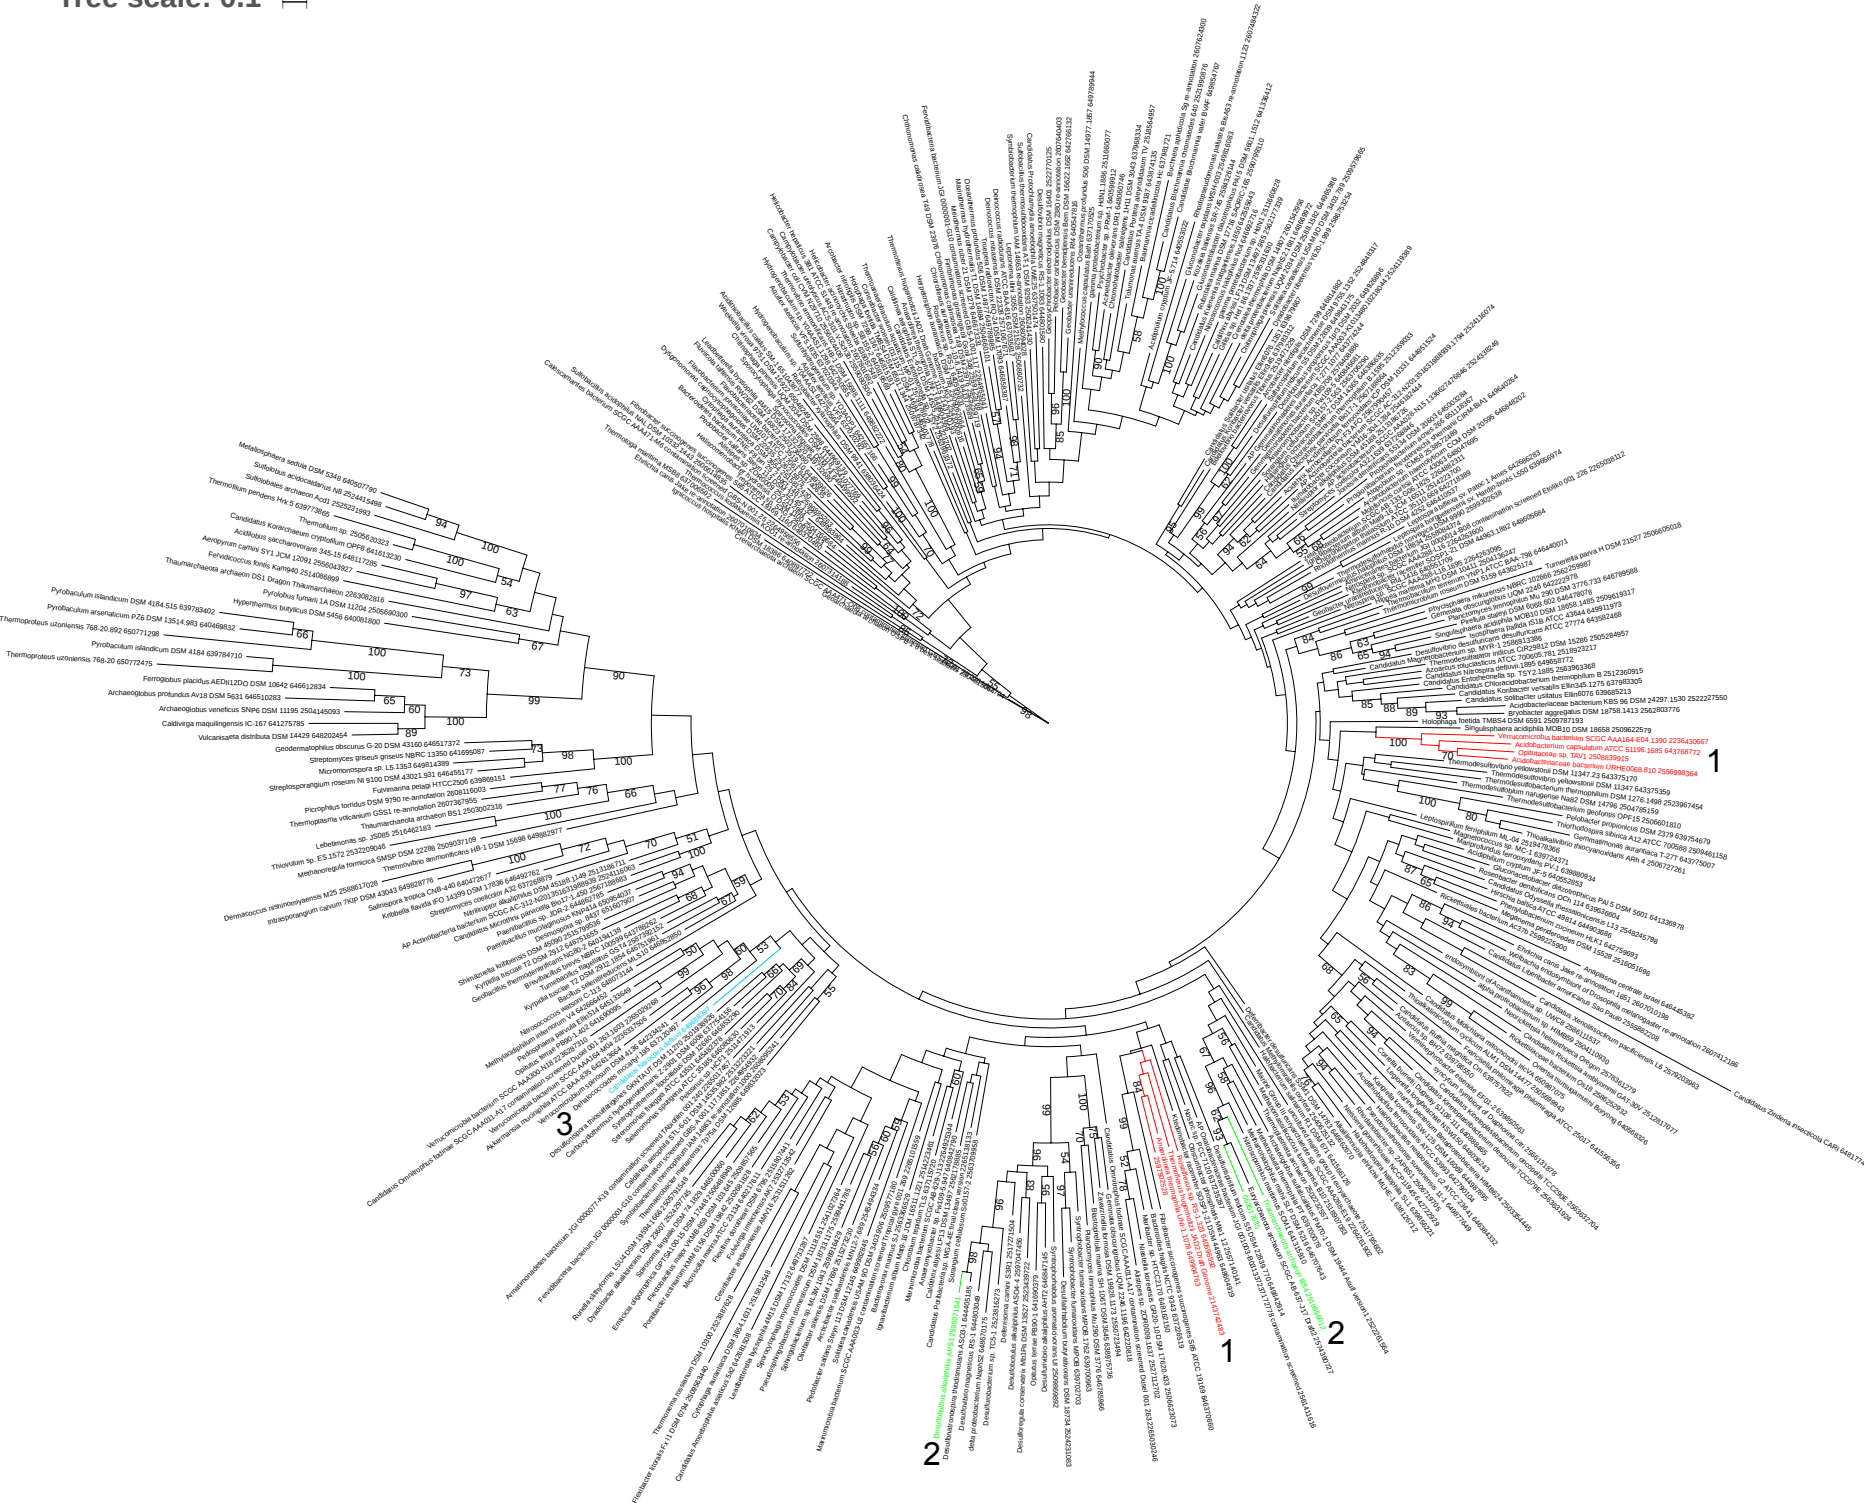

Supplement: 41396_2018_210_MOESM27_ESM.pdf [file 41396_2018_210_MOESM27_ESM.pdf]

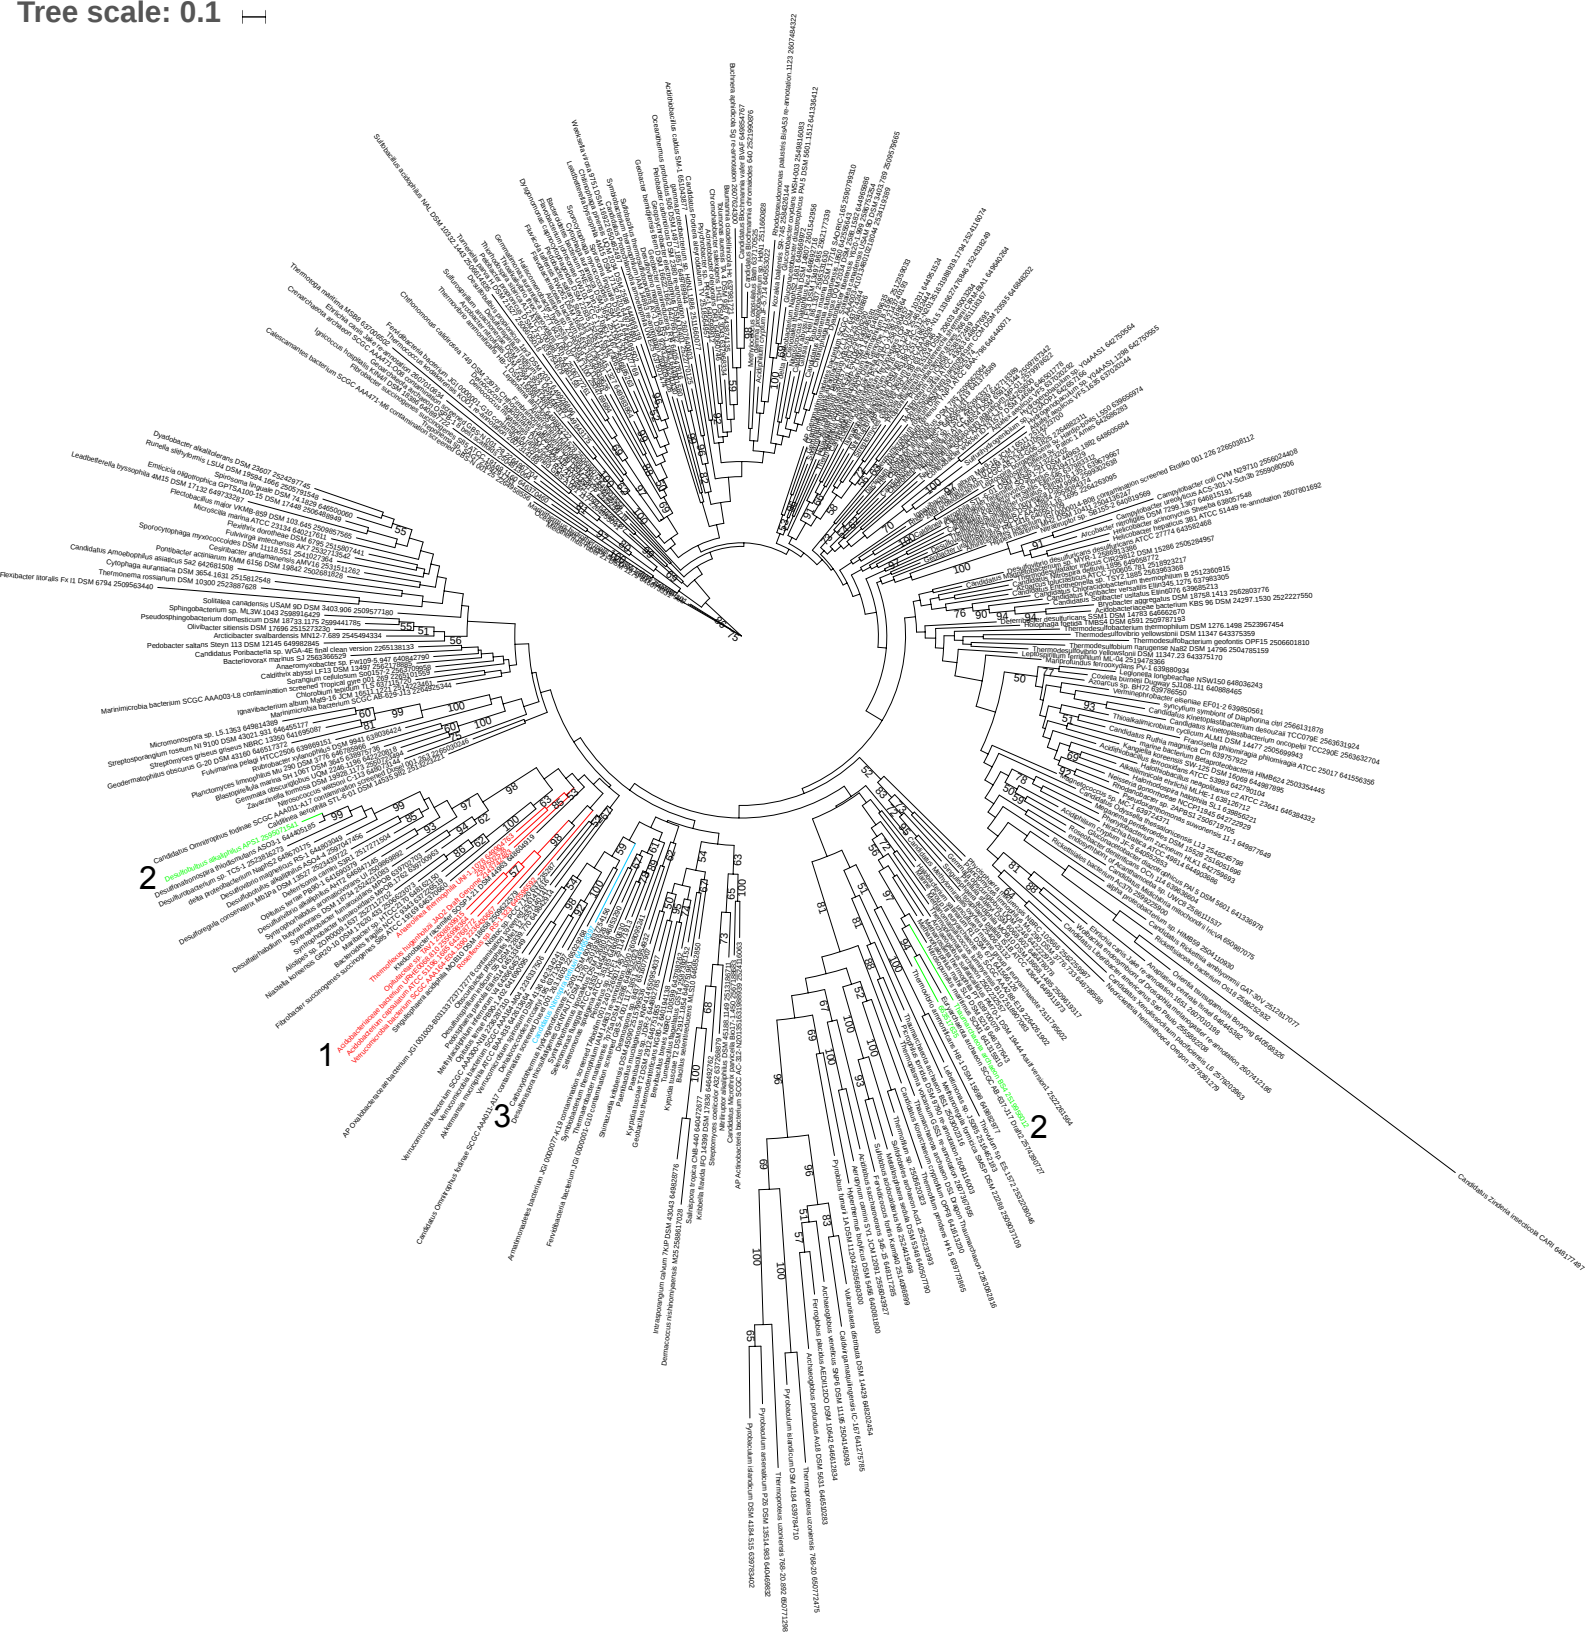

2

1

3

2

Supplement: 41396_2018_210_MOESM28_ESM.pdf [file 41396_2018_210_MOESM28_ESM.pdf]

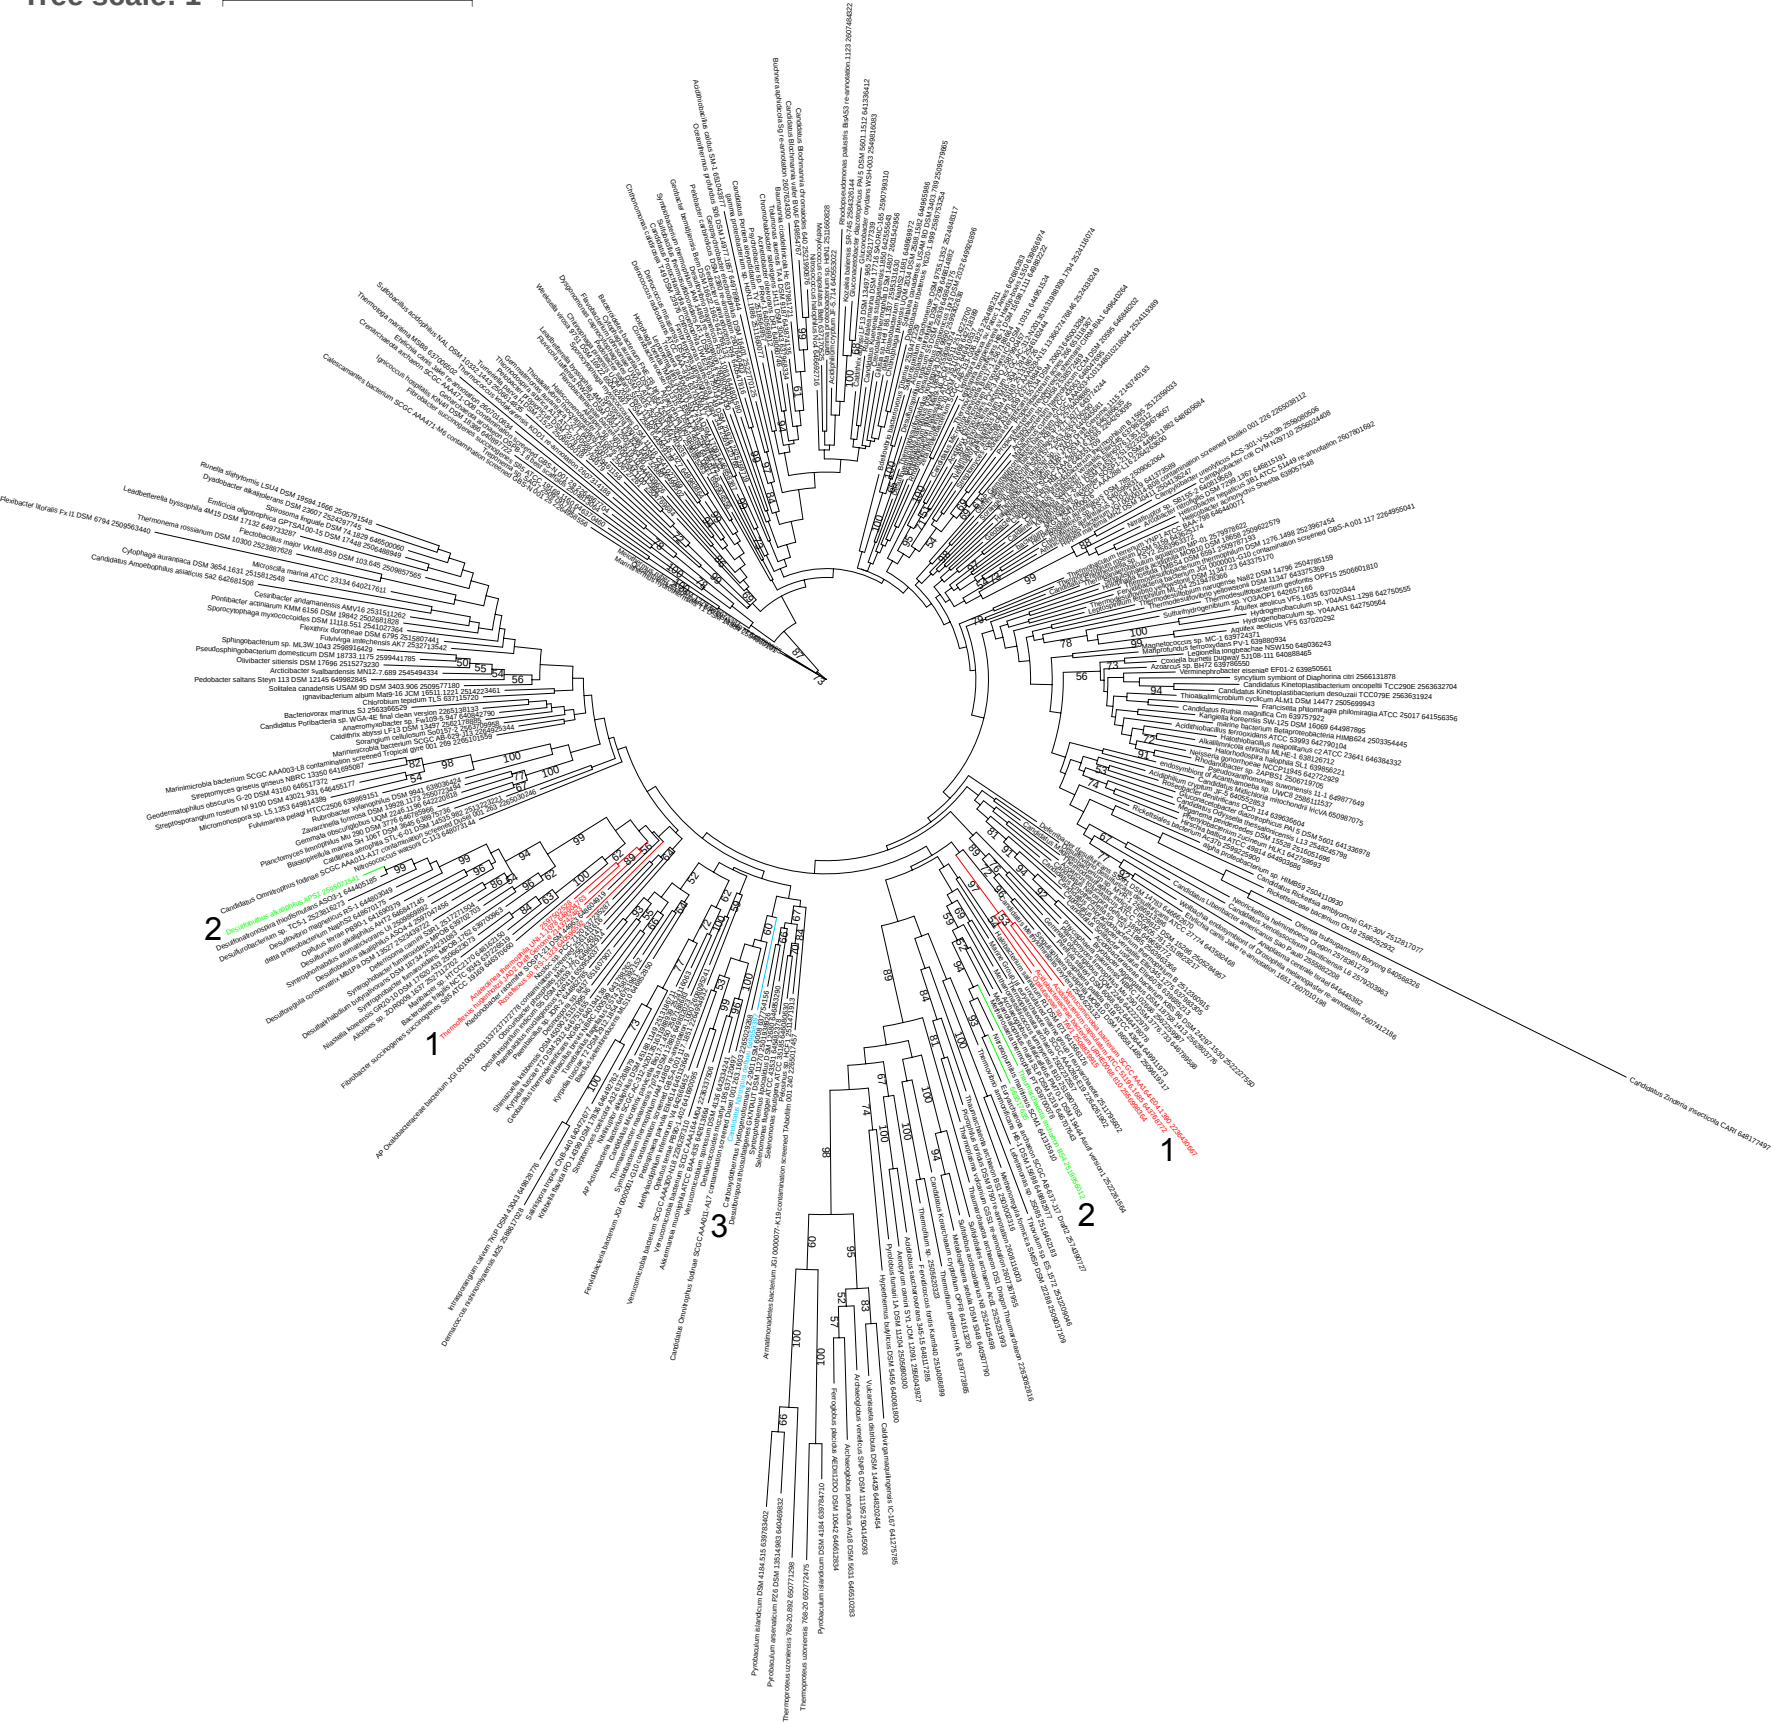

Supplement: 41396_2018_210_MOESM29_ESM.pdf [file 41396_2018_210_MOESM29_ESM.pdf]

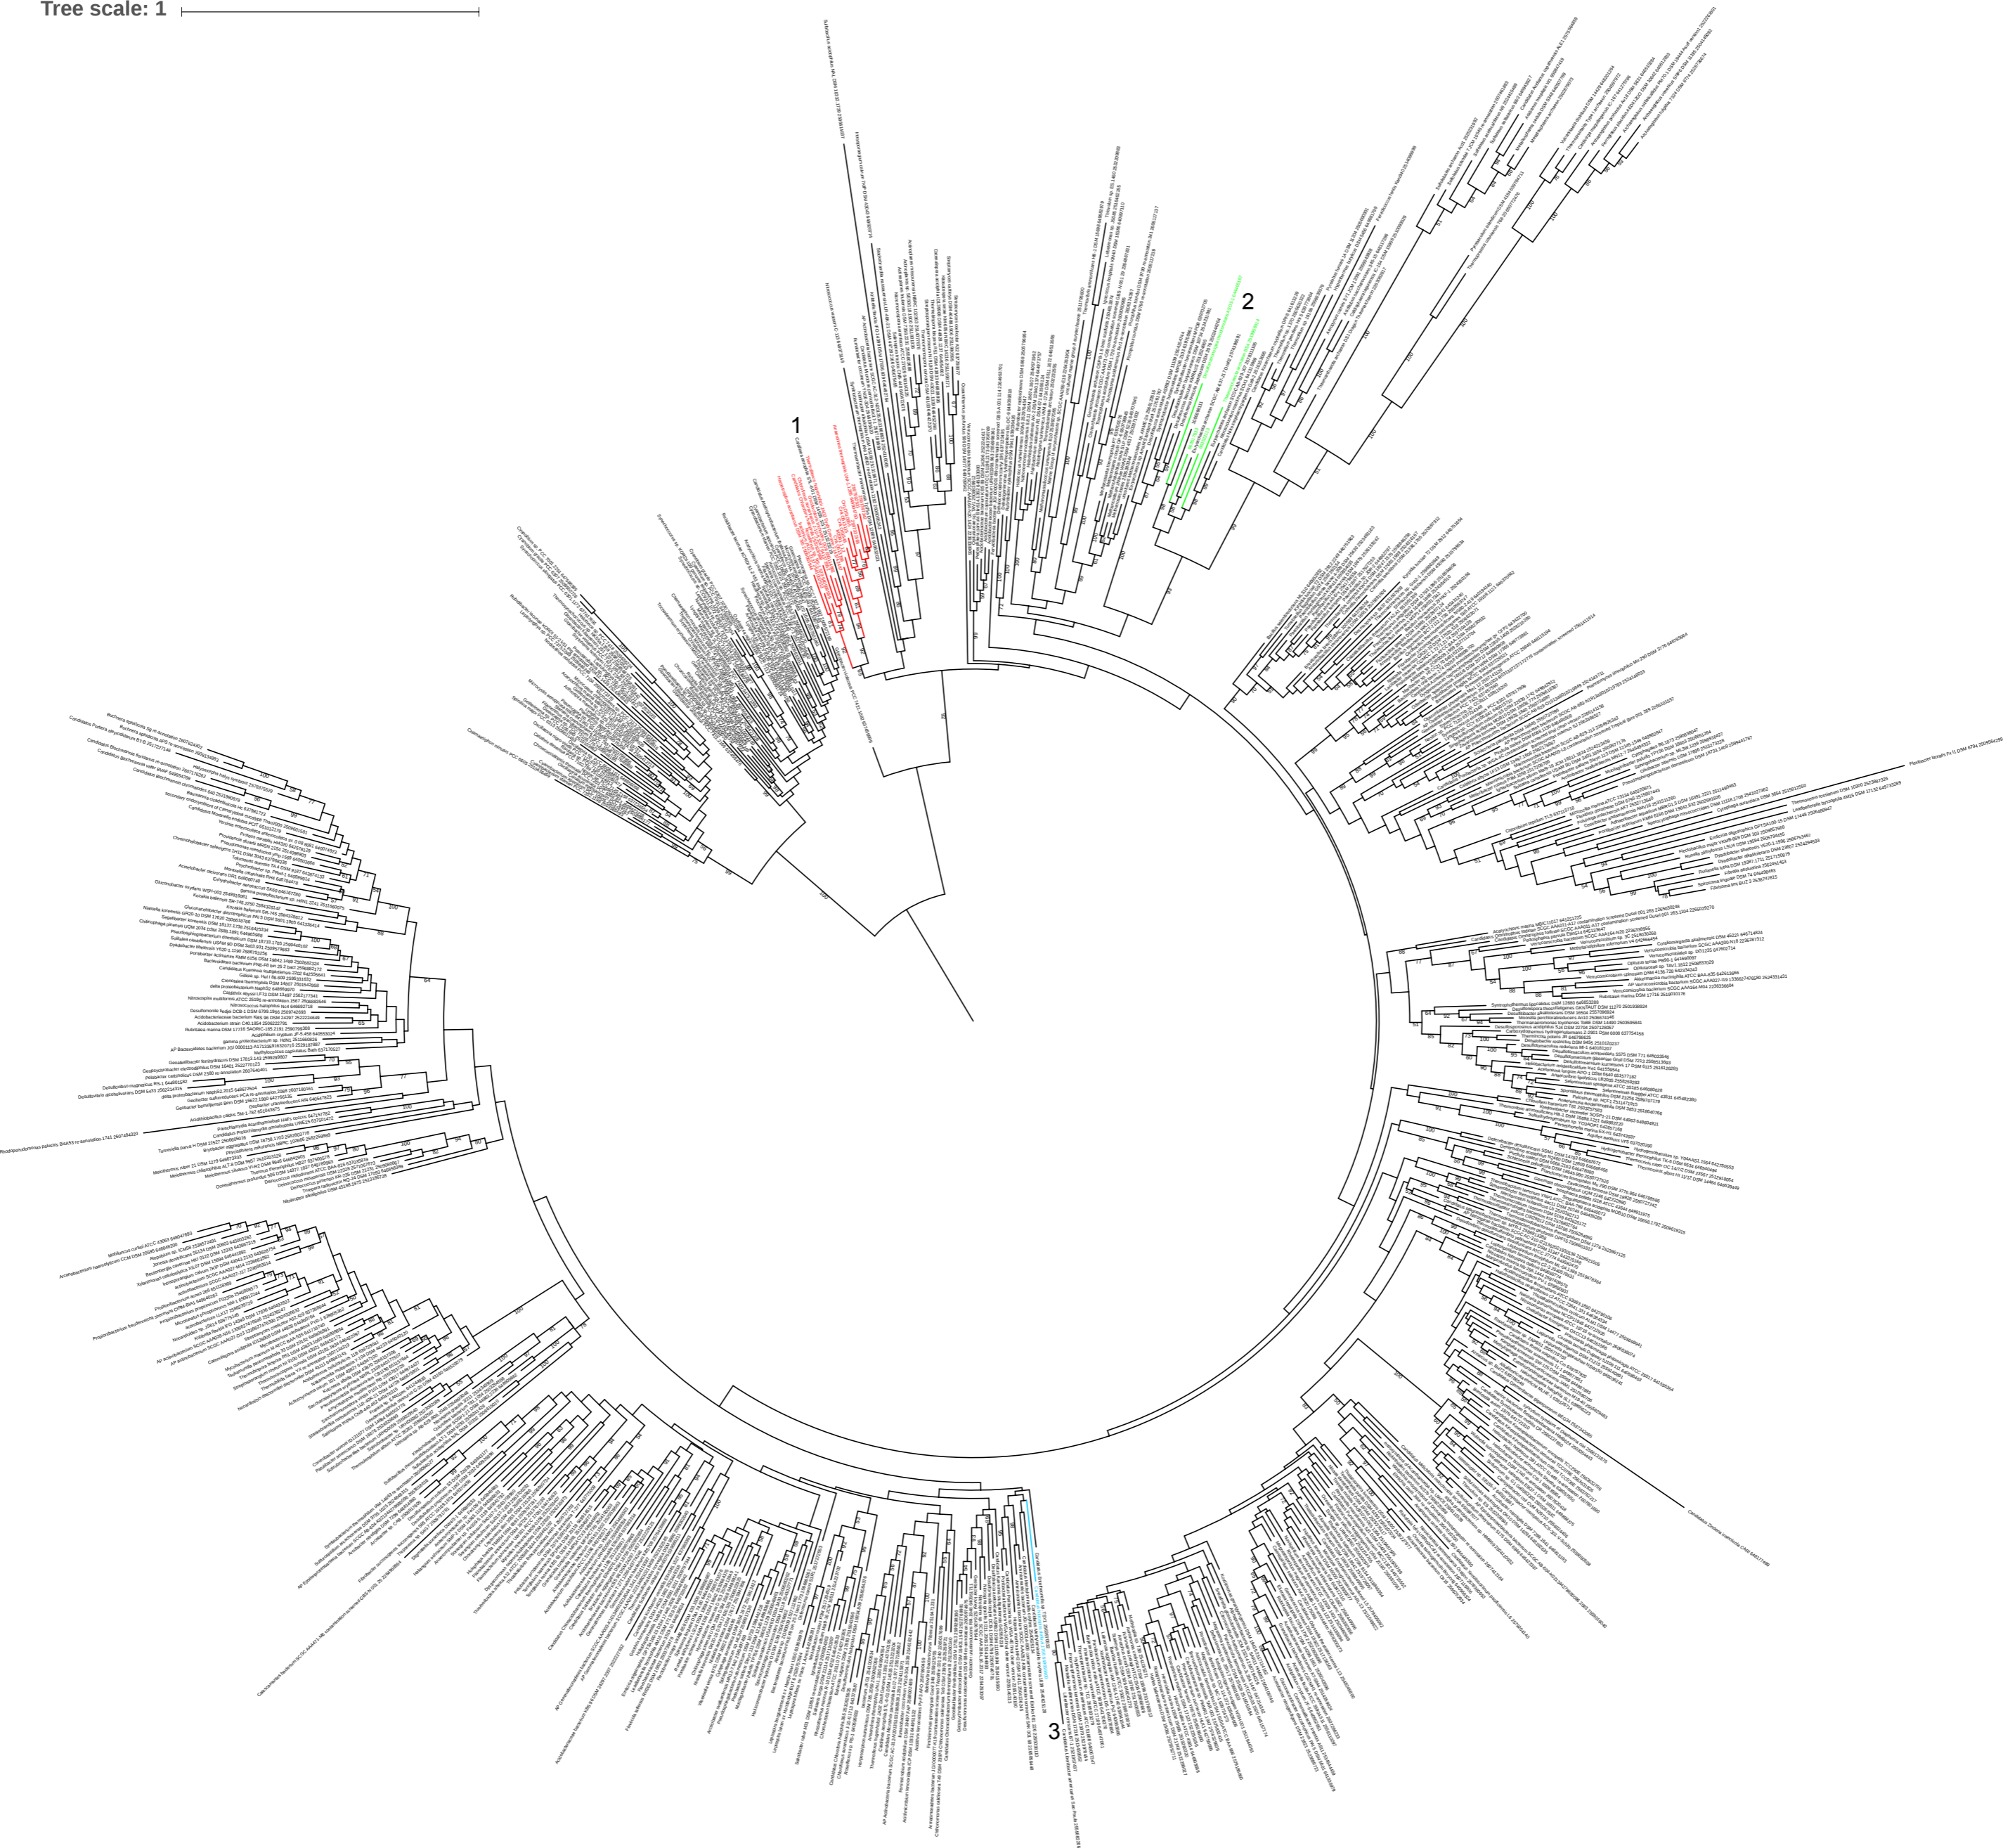

Supplement: 41396_2018_210_MOESM2_ESM.pdf [file 41396_2018_210_MOESM2_ESM.pdf]

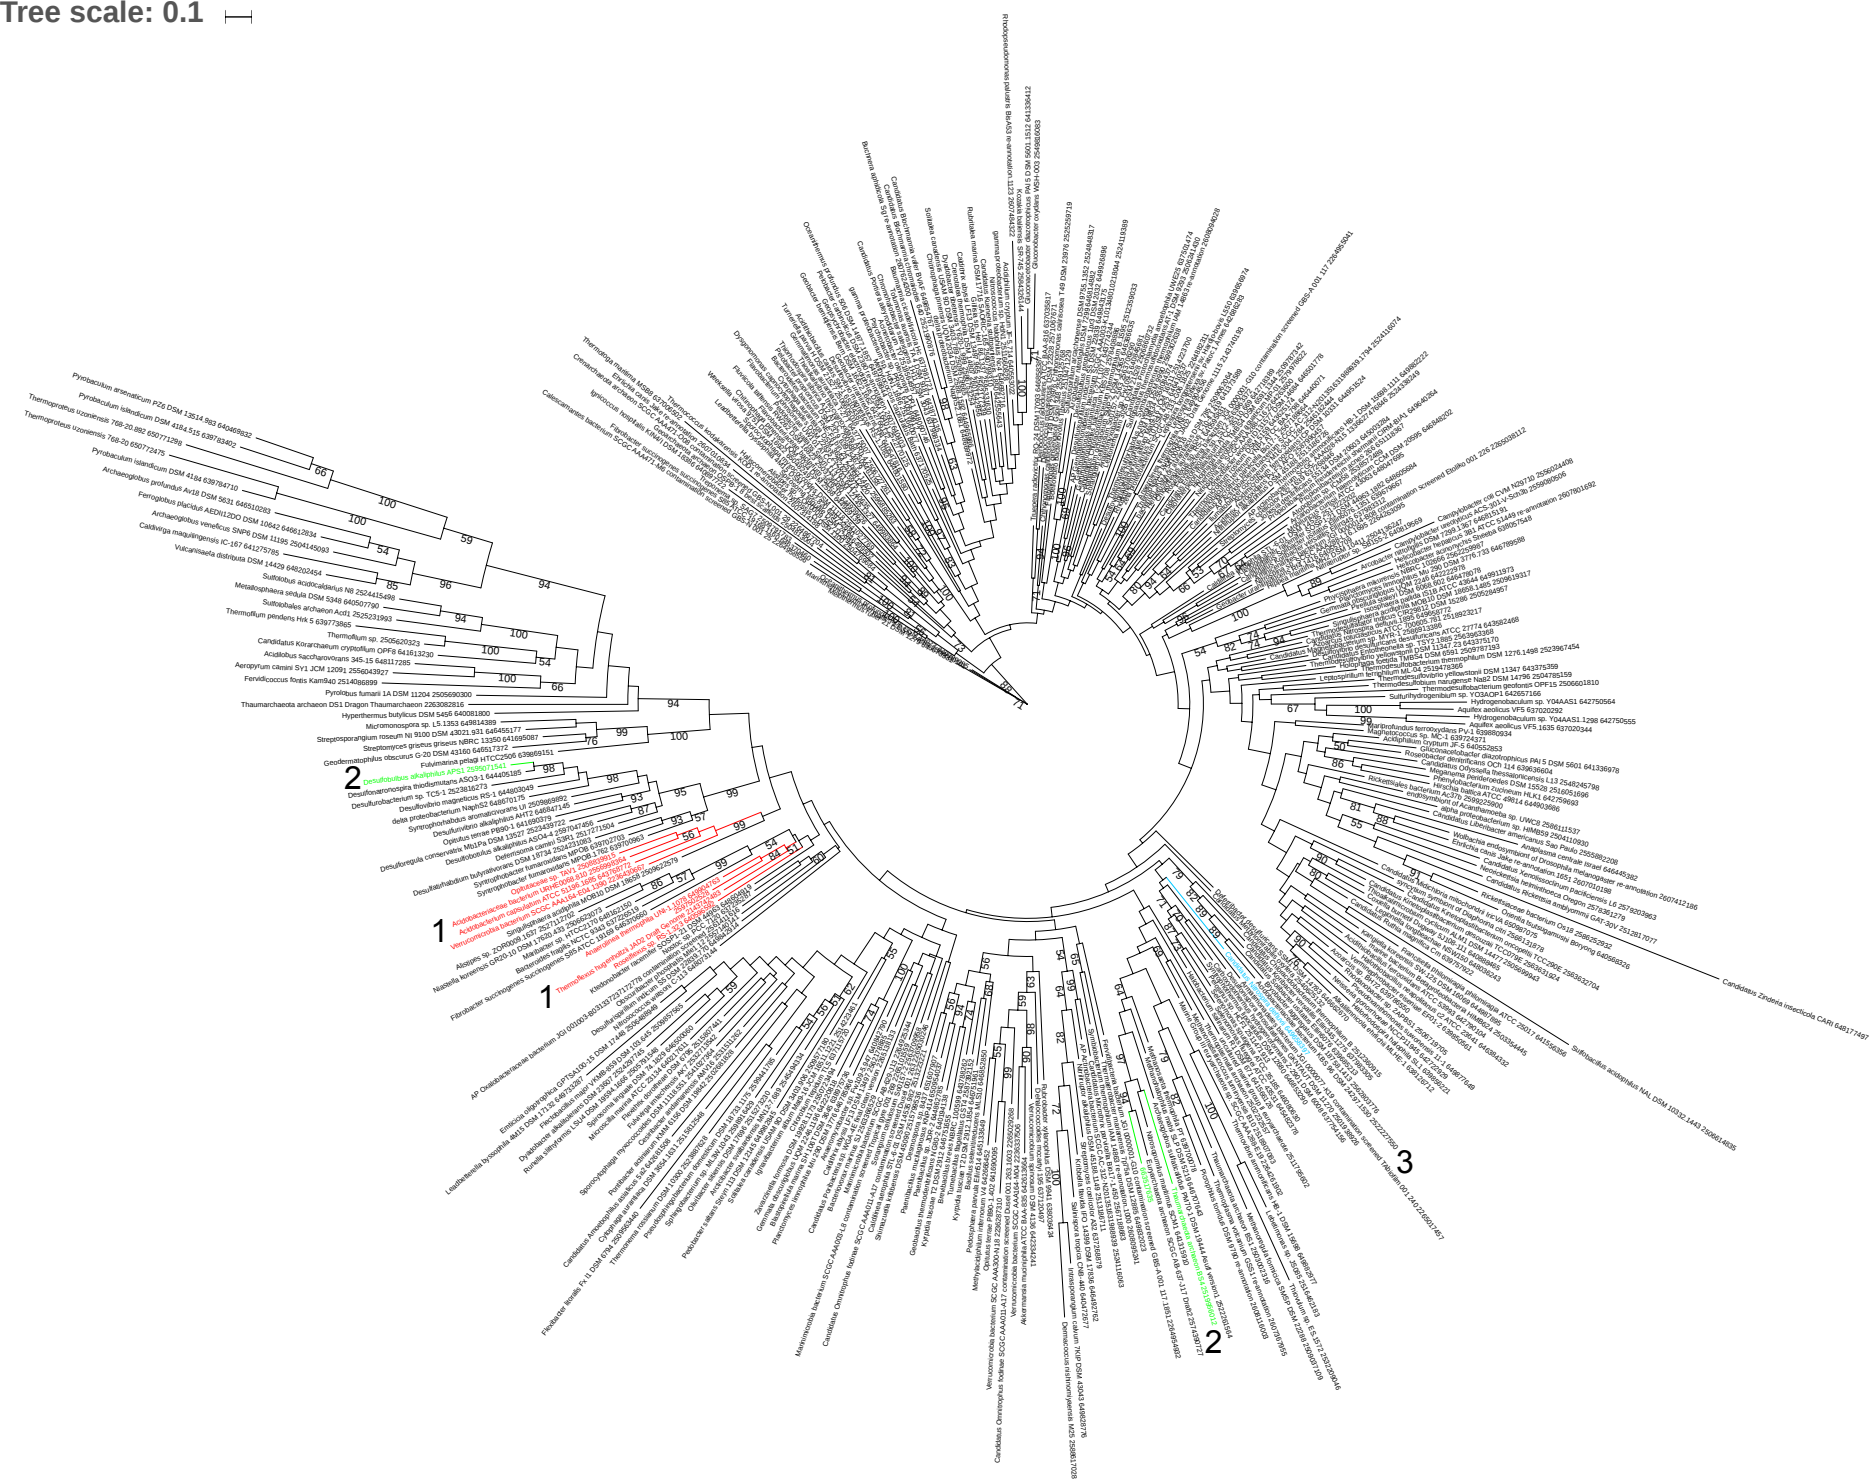

Supplement: 41396_2018_210_MOESM30_ESM.pdf [file 41396_2018_210_MOESM30_ESM.pdf]

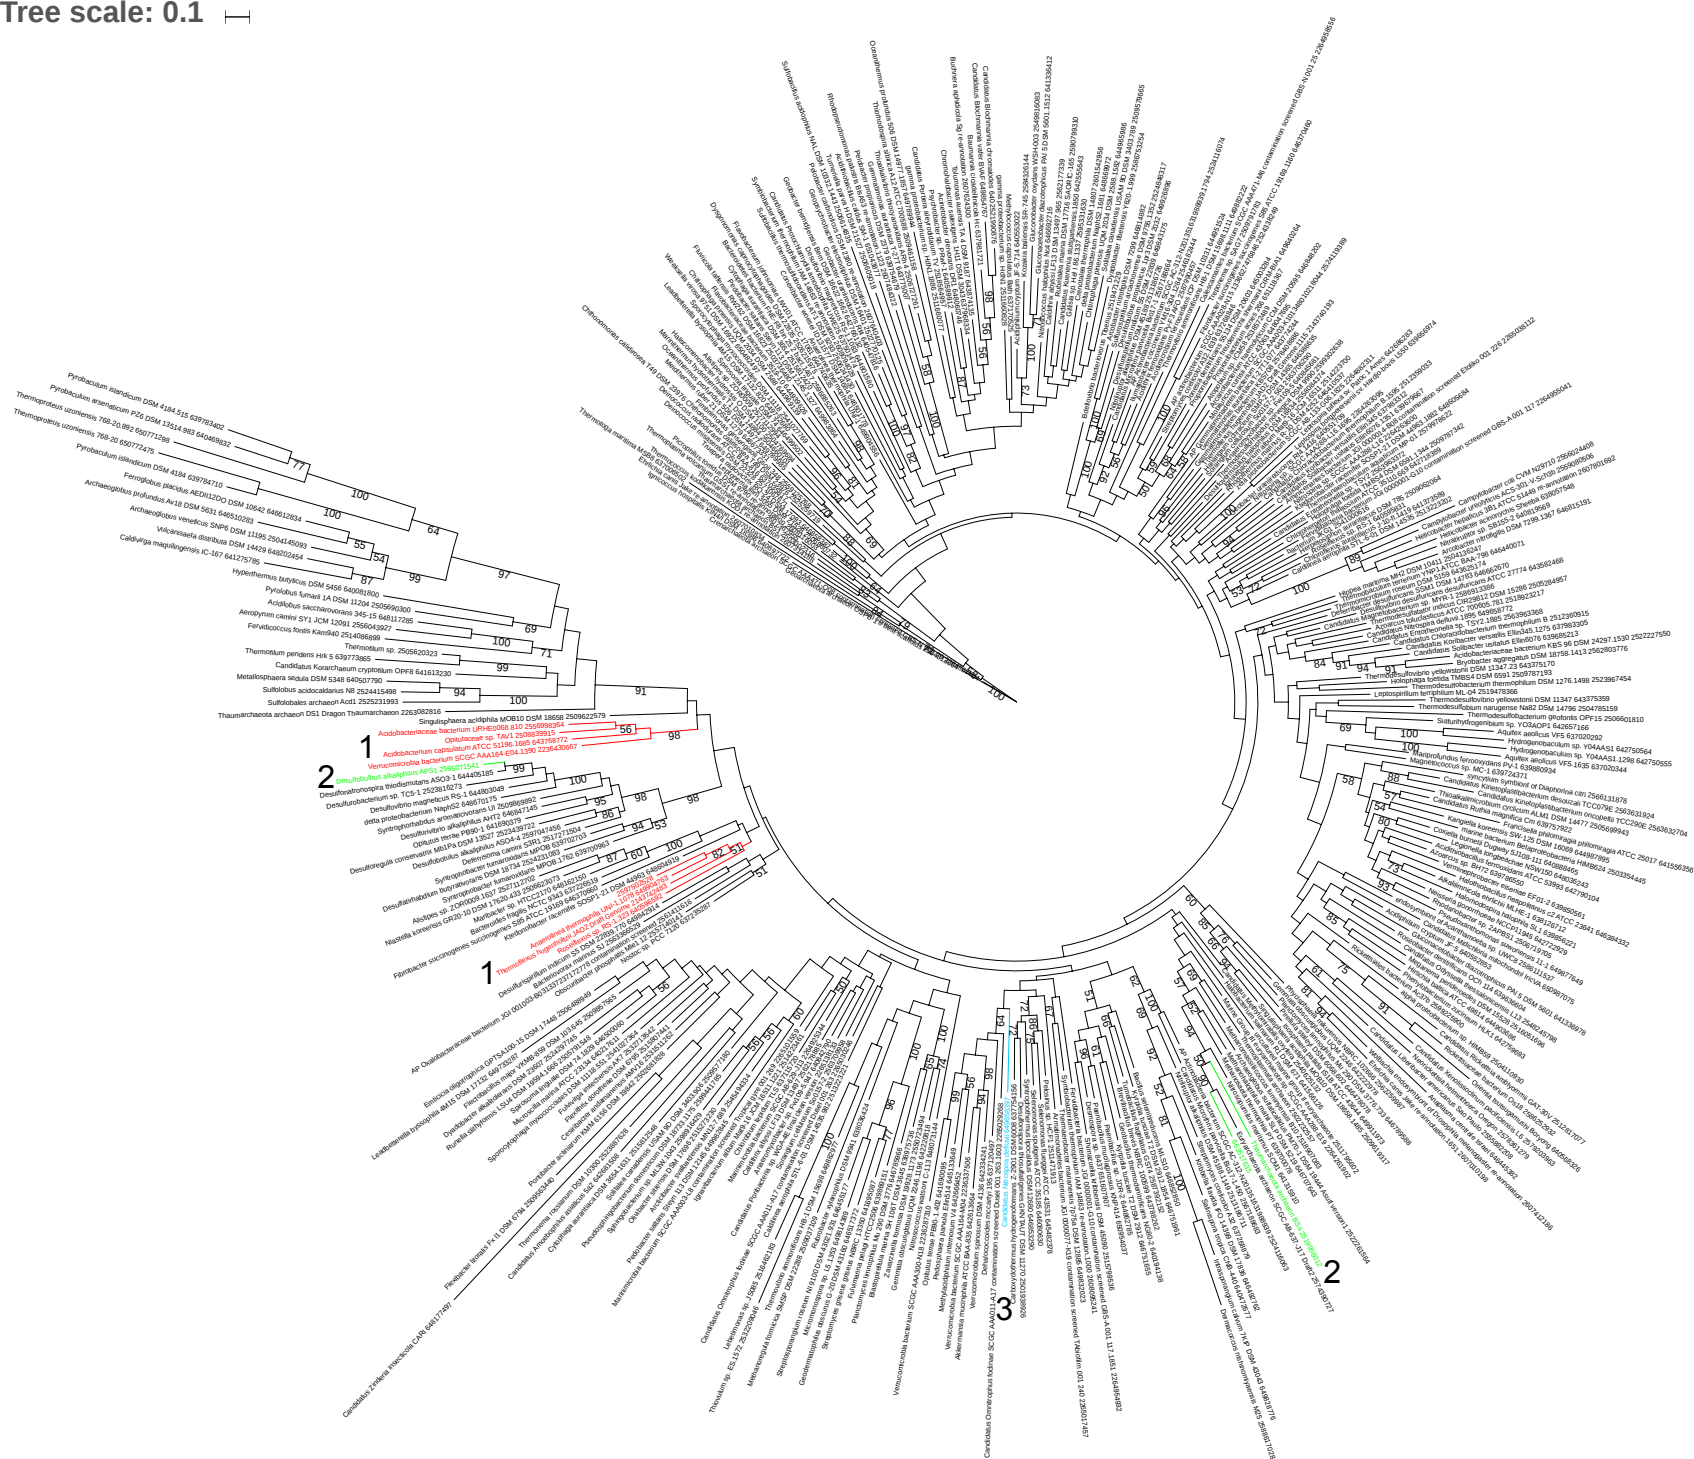

Supplement: 41396_2018_210_MOESM31_ESM.pdf [file 41396_2018_210_MOESM31_ESM.pdf]

Tree scale: 0.1

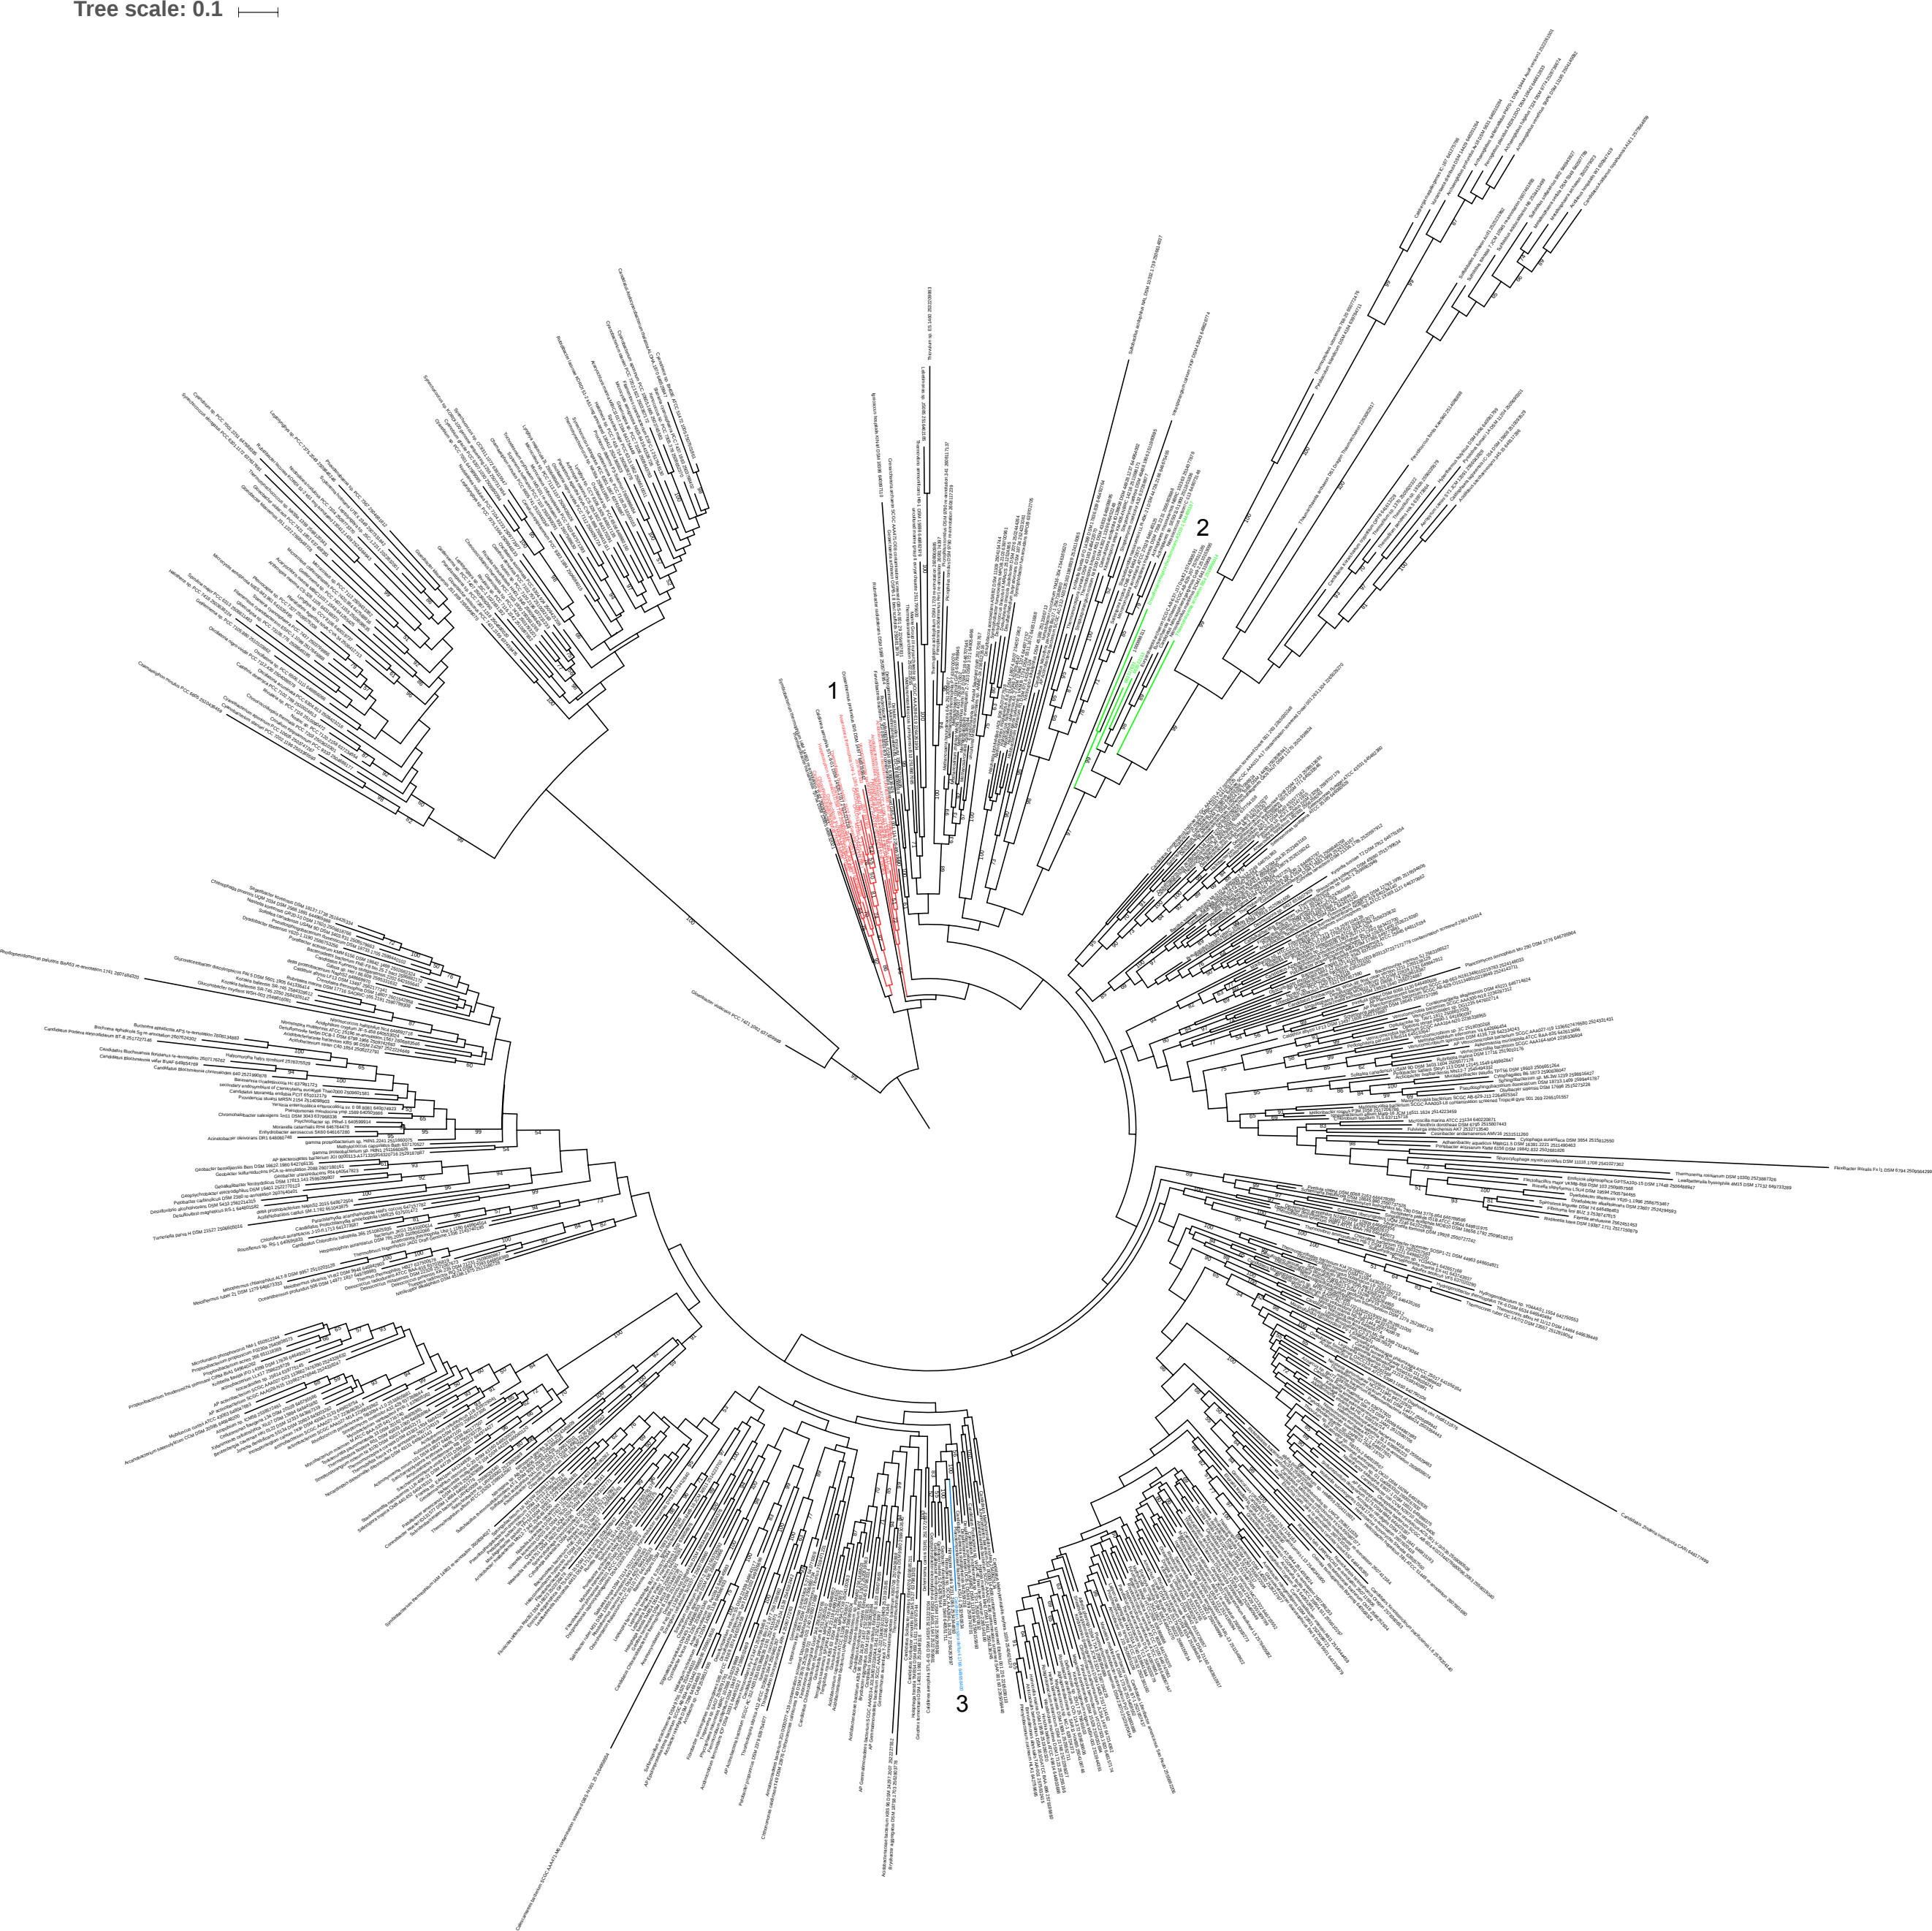

Supplement: 41396_2018_210_MOESM3_ESM.pdf [file 41396_2018_210_MOESM3_ESM.pdf]

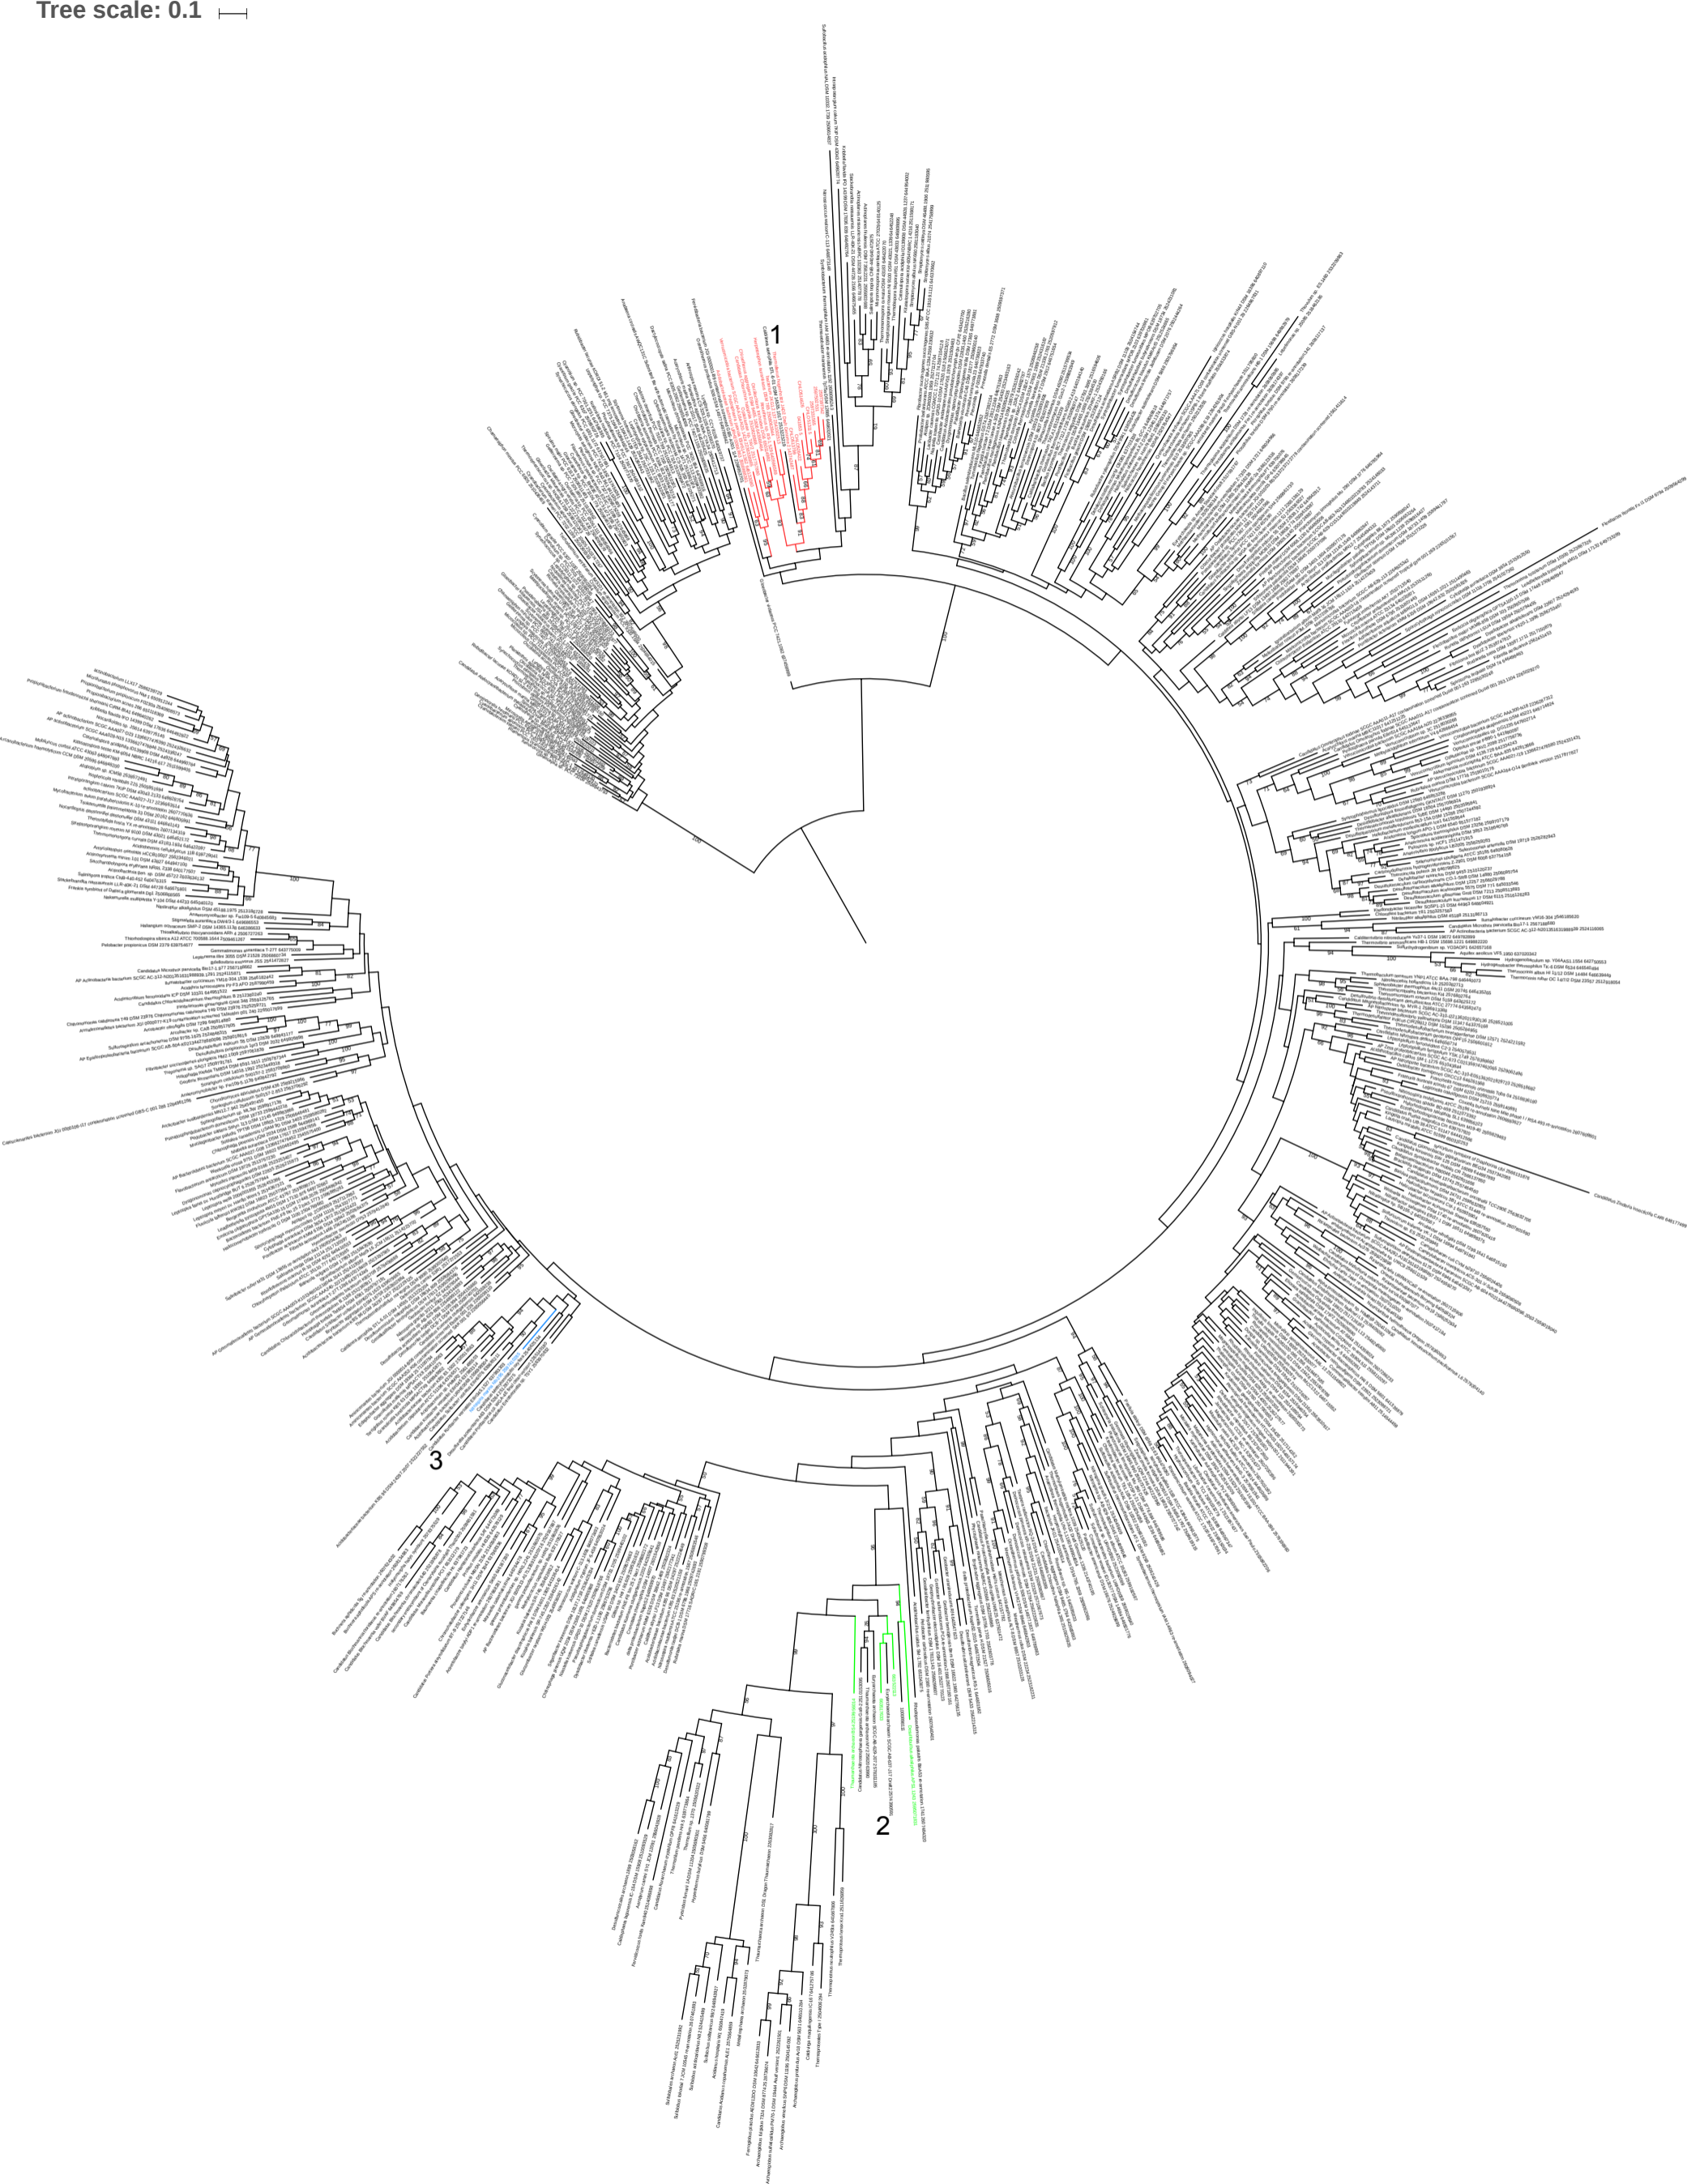

Supplement: 41396_2018_210_MOESM4_ESM.pdf [file 41396_2018_210_MOESM4_ESM.pdf]
